# Supplementary material for: Industrial Investigation of the Combined Action of Vacuum Residue Hydrocracking and Vacuum Gas Oil Catalytic Cracking While Processing Different Feeds and Operating under Distinct Conditions
Source: MDPI journal article supplement (doi:10.3390/pr11113174), 2023-11-07
Supplement: s1 [file s1]

## Supplementary Materials

Article

# Industrial Investigation of the Combined Action of Vacuum Residue Hydrocracking and Vacuum Gas Oil Catalytic Cracking While Processing Different Feeds and Operating under Distinct Conditions

Dicho Stratiev <sup>1,2,\*</sup>, Vesislava Toteva <sup>3</sup>, Ivelina Shishkova <sup>1</sup>, Svetoslav Nenov <sup>4</sup>, Dimitar Pilev <sup>5</sup>, Krassimir Atanassov <sup>2,6</sup>, Vesselina Bureva <sup>6</sup>, Svetlin Vasilev <sup>6</sup> and Danail D. Stratiev <sup>2</sup>

<sup>1</sup> LUKOIL Neftohim Burgas, 8104 Burgas, Bulgaria; shishkova.ivelina.k@neftochim.bg

<sup>2</sup> Institute of Biophysics and Biomedical Engineering, Bulgarian Academy of Sciences, Georgi Bonchev 105, 1113 Sofia, Bulgaria; k.t.atanassov@gmail.com (K.A.); danail.stratiev@gmail.com (D.D.S.)

<sup>3</sup> Department Chemical Technologies, University of Chemical Technology and Metallurgy, Kliment Ohridski 8, 1756 Sofia, Bulgaria; vesislava@uctm.edu

<sup>4</sup> Department of Mathematics, University of Chemical Technology and Metallurgy, Kliment Ohridski 8, 1756 Sofia, Bulgaria; s.nenov@gmail.com

<sup>5</sup> Department of Informatics, University of Chemical Technology and Metallurgy, Kliment Ohridski 8, 1756 Sofia, Bulgaria; pilev@uctm.edu

<sup>6</sup> Intelligent Systems Laboratory, Department Industrial Technologies and Management, University Prof. Dr. Assen Zlatarov, Professor Yakimov 1, 8010 Burgas, Bulgaria; vesito\_ka@abv.bg (V.B.); svetlyov@mail.bg (S.V.)

\* Correspondence: stratiev.dicho@neftochim.bg

**Table S1.** Composition of the partially blended fuel oil (PBFO)

| No | Date       | HCO in PBFO,<br>% | LCO in PBFO,<br>% | SLO in PBFO,<br>% | VTB in PBFO,<br>% |
|----|------------|-------------------|-------------------|-------------------|-------------------|
| 1  | 11.04.2022 | 23.0              | 0.0               | 0.4               | 76.6              |
| 2  | 23.05.2022 | 24.8              | 0.0               | 6.6               | 68.5              |
| 3  | 30.05.2022 | 16.2              | 0.0               | 6.4               | 77.5              |
| 4  | 06.06.2022 | 17.4              | 0.0               | 6.5               | 76.1              |
| 5  | 13.06.2022 | 16.4              | 0.0               | 4.2               | 79.4              |
| 6  | 20.06.2022 | 20.1              | 0.0               | 4.8               | 75.0              |
| 7  | 27.06.2022 | 24.6              | 0.0               | 5.3               | 70.1              |
| 8  | 4.07.2022  | 27.5              | 0.0               | 6.1               | 66.4              |
| 9  | 11.07.2022 | 26.9              | 0.0               | 5.8               | 67.2              |
| 10 | 05.09.2022 | 30.6              | 1.6               | 5.5               | 62.3              |
| 11 | 03.10.2022 | 0.0               | 42.1              | 10.2              | 47.7              |
| 12 | 28.11.2022 | 35.1              | 0.0               | 11.0              | 53.9              |
| 13 | 03.01.2023 | 24.9              | 13.6              | 2.4               | 59.0              |
| 14 | 30.01.2023 | 26.0              | 11.2              | 2.9               | 59.9              |
| 15 | 06.02.2023 | 24.9              | 11.3              | 6.7               | 57.2              |
| 16 | 13.02.2023 | 38.1              | 0.0               | 6.4               | 55.5              |
| 17 | 20.02.2023 | 37.4              | 0.0               | 4.4               | 58.2              |

|    |            |      |      |      |      |
|----|------------|------|------|------|------|
| 18 | 27.02.2023 | 36.9 | 0.0  | 4.8  | 58.3 |
| 19 | 06.03.2023 | 43.2 | 0.0  | 5.4  | 51.4 |
| 20 | 13.03.2023 | 42.3 | 0.0  | 6.6  | 51.1 |
| 21 | 20.03.2023 | 28.4 | 5.9  | 9.9  | 55.8 |
| 22 | 27.03.2023 | 27.9 | 13.8 | 5.5  | 52.7 |
| 23 | 03.04.2023 | 40.3 | 0.0  | 9.3  | 50.5 |
| 24 | 10.04.2023 | 44.5 | 0.0  | 7.8  | 47.7 |
| 25 | 18.04.2023 | 52.6 | 0.0  | 0.0  | 47.4 |
| 26 | 24.04.2023 | 75.6 | 0.0  | 0.0  | 24.4 |
| 27 | 28.04.2023 | 52.2 | 0.0  | 0.0  | 47.8 |
| 28 | 09.05.2023 | 33.7 | 0.0  | 11.3 | 55.0 |
| 29 | 15.05.2023 | 34.1 | 0.0  | 10.8 | 55.1 |
| 30 | 22.05.2023 | 52.2 | 0.0  | 7.4  | 40.4 |
| 31 | 29.05.2023 | 45.5 | 0.0  | 7.9  | 46.6 |
| 32 | 05.06.2023 | 45.9 | 0.0  | 10.6 | 43.5 |
| 33 | 12.06.2023 | 31.4 | 0.0  | 12.1 | 56.6 |
| 34 | 19.06.2023 | 33.0 | 0.0  | 11.3 | 55.7 |
| 35 | 26.06.2023 | 33.7 | 0.0  | 8.0  | 58.2 |
| 36 | 03.07.2023 | 19.1 | 0.0  | 3.1  | 77.7 |
| 37 | 10.07.2023 | 14.1 | 0.0  | 13.0 | 73.0 |
| 38 | 17.07.2023 | 11.7 | 0.0  | 3.9  | 84.4 |
| 39 | 24.07.2023 | 16.1 | 0.0  | 10.6 | 73.4 |
|    | min        | 0.0  | 0.0  | 0.0  | 24.4 |
|    | max        | 75.6 | 42.1 | 13.0 | 84.4 |
|    | average    | 31.5 | 2.6  | 6.5  | 59.4 |

**Table S2.** Properties of diluents used to blend with H-Oil VTB obtained at very low severity (WABT of 405°C)

|                | FCC SLO     | FCCPT diesel | FCC LCO | FCC HCO |
|----------------|-------------|--------------|---------|---------|
| Sim.Dis, % wt. | ASTM D-2887 |              |         |         |
| IBP            | 196         | 167          | 138     | 196     |
| 5              | 321         | 221          | 177     | 251     |
| 10             | 341         | 252          | 195     | 267     |
| 20             | 366         | 287          | 207     | 281     |
| 30             | 383         | 309          | 220     | 296     |
| 40             | 399         | 323          | 230     | 306     |
| 50             | 413         | 336          | 232     | 321     |
| 60             | 428         | 347          | 247     | 332     |
| 70             | 444         | 358          | 253     | 344     |
| 80             | 463         | 268          | 258     | 358     |
| 90             | 487         | 382          | 272     | 379     |

|                                       |        |        |        |        |
|---------------------------------------|--------|--------|--------|--------|
| 95                                    | 506    | 392    | 282    | 397    |
| FBP                                   | 539    | 419    | 319    | 446    |
| Density at 15°C, g/cm <sup>3</sup>    | 1.1146 | 0.8848 | 0.9412 | 1.0336 |
| Kw-characterization factor*           | 9.63   | 11.65  | 10.29  | 9.89   |
| Viscosity at 80°C, mm <sup>2</sup> /s | 56.7   | 2.85   | 1.35   | 2.91   |
| Engler specific viscosity at 80°C, °E | 7.65   |        |        |        |
| Refractive index at 20°C              | 1.6489 | 1.4953 | 1.5380 | 1.5963 |
| Molecular weight, g/mol               | 297    | 253    | 160    | 218    |
| Aromatic ring index (ARI)             | 3.6    | 1.1    | 1.5    | 2.4    |

\*Note: Kw-characterization factor is calculated by the expression:

$$Kw = \frac{\sqrt[3]{1.8 \left[ \frac{T_{10} + T_{30} + T_{50} + T_{70} + T_{90}}{5} + 273.15 \right]}}{d_{15}} \quad \text{eq.S1 (ref. S1)}$$

where,

T10 – boiling point of 10% of evaporate according to the HTSD (ASTM D7169), °C;

T30 – boiling point of 30% of evaporate according to the HTSD (ASTM D7169), °C;

T50 – boiling point of 50% of evaporate according to the HTSD (ASTM D7169), °C;

T70 – boiling point of 70% of evaporate according to the HTSD (ASTM D7169), °C;

T90 – boiling point of 10% of evaporate according to the HTSD (ASTM D7169), °C.

Ref. S1. Gharagheizi, F., Fazeli, A. Prediction of the Watson characterization factor of hydrocarbon components from molecular properties. QSAR Comb. Sci. 2008, 27, 6, 758 – 767, <https://doi.org/10.1002/qsar.200730020>.

**Table S3.** Hydrodeasphaltization extent (HDAs), vacuum residue (540°C+) conversion, hydrodemetallization extent (HDM), and reaction temperatures in both reactors, and reactor temperature  $\Delta T$

| No | Date       | HDAs(C <sub>5</sub> ), HDAs(C <sub>7</sub> ), |      | H-Oil Net   | HDM, | LHSV,           | WABT, | T-     | T-     | R-              | R-              |
|----|------------|-----------------------------------------------|------|-------------|------|-----------------|-------|--------|--------|-----------------|-----------------|
|    |            | %                                             | %    | conversion, |      |                 |       | R1001, | R1002, | 1001            | 1002            |
|    |            |                                               |      | wt. %       | %    | h <sup>-1</sup> | °C    | °C     | °C     | $\Delta T$ , °C | $\Delta T$ , °C |
| 1  | 11.04.2022 | 50.0                                          | 60.1 | 62.0        | 50.0 | 0.14            | 414.5 | 414    | 415    | 54              | 52              |
| 2  | 23.05.2022 | 75.4                                          | 69.9 | 71.6        | 79.4 | 0.17            | 421.5 | 419    | 424    | 65              | 51              |
| 3  | 30.05.2022 | 69.0                                          | 66.3 | 69.7        | 77.7 | 0.18            | 421.5 | 419    | 424    | 67              | 43              |
| 4  | 06.06.2022 | 69.6                                          | 57.4 | 70.8        | 82.0 | 0.18            | 421.5 | 420    | 423    | 68              | 41              |
| 5  | 13.06.2022 | 71.0                                          | 64.3 | 71.6        | 82.0 | 0.17            | 421.5 | 421.5  | 421.5  | 68.5            | 35.5            |
| 6  | 20.06.2022 | 68.0                                          | 67.0 | 74.7        | 88.3 | 0.17            | 424.5 | 424.5  | 424.5  | 74.5            | 39.5            |
| 7  | 27.06.2022 | 75.2                                          | 70.3 | 75.5        | 87.1 | 0.17            | 425   | 425    | 425    | 75              | 41              |
| 8  | 04.07.2022 | 79.7                                          | 80.9 | 76.5        | 89.0 | 0.18            | 428   | 428    | 428    | 78              | 41              |
| 9  | 11.07.2022 | 81.4                                          | 79.6 | 77.4        | 89.5 | 0.18            | 428   | 428    | 428    | 77              | 40              |
| 10 | 05.09.2022 | 67.5                                          | 55.2 | 77.0        | 85.2 | 0.19            | 431   | 430    | 432    | 91              | 40              |
| 11 | 03.10.2022 | 82.9                                          | 80.5 | 78.0        | 89.9 | 0.2             | 430   | 429    | 431    | 80              | 34              |
| 12 | 28.11.2022 | 74.4                                          | 73.4 | 82.7        | 90.0 | 0.17            | 431   | 430    | 432    | 84              | 43              |
| 13 | 03.01.2023 | 66.3                                          | 69.7 | 73          | 81.8 | 0.21            | 430   | 430    | 430    | 84              | 41              |
| 14 | 30.01.2023 | 65.3                                          | 64.0 | 77          | 82.3 | 0.20            | 430   | 430    | 430    | 79              | 41              |
| 15 | 06.02.2023 | 74.4                                          | 74.6 | 79.6        | 91.6 | 0.16            | 430   | 430    | 430    | 85              | 43              |
| 16 | 13.02.2023 | 81.7                                          | 80.2 | 84.9        | 95.3 | 0.16            | 430   | 430    | 430    | 80              | 44              |
| 17 | 20.02.2023 | 77.9                                          | 76.0 | 82.1        | 93.9 | 0.15            | 430   | 430    | 430    | 79              | 41              |
| 18 | 27.02.2023 | 85.0                                          | 78.2 | 83.4        | 93.4 | 0.14            | 430   | 430    | 430    | 80              | 43              |
| 19 | 06.03.2023 | 82.2                                          | 79.9 | 84.5        | 94.4 | 0.15            | 430   | 430    | 430    | 76              | 43              |
| 20 | 13.03.2023 | 83.8                                          | 78.2 | 87.0        | 94.6 | 0.13            | 430   | 430    | 430    | 82              | 47              |
| 21 | 20.03.2023 | 78.9                                          | 76.3 | 85.3        | 90.6 | 0.15            | 430   | 430    | 430    | 81              | 46              |
| 22 | 27.03.2023 | 81.0                                          | 76.8 | 86.2        | 93.1 | 0.13            | 430   | 430    | 430    | 86              | 47              |
| 23 | 03.04.2023 | 87.5                                          | 84.1 | 91.7        | 96.6 | 0.12            | 430   | 430    | 430    | 83              | 46              |
| 24 | 10.04.2023 | 84.3                                          | 84.8 | 90.5        | 94.2 | 0.13            | 430   | 430    | 430    | 88              | 53              |
| 25 | 18.04.2023 | 81.7                                          | 84.8 | 88.6        | 94.4 | 0.16            | 430   | 430    | 430    | 90              | 52              |
| 26 | 24.04.2023 | 87.3                                          | 82.2 | 89.4        | 92.0 | 0.15            | 430   | 430    | 430    | 91              | 50              |
| 27 | 28.04.2023 | 84.7                                          | 82.9 | 87.1        | 90.2 | 0.15            | 430   | 430    | 430    | 96              | 55              |
| 28 | 09.05.2023 | 78.6                                          | 75.5 | 86.6        | 92.0 | 0.13            | 430   | 430    | 430    | 92              | 48              |
| 29 | 15.05.2023 | 76.9                                          | 69.4 | 86.2        | 91.5 | 0.13            | 430   | 430    | 430    | 72              | 36              |
| 30 | 22.05.2023 | 75.1                                          | 72.2 | 85.6        | 90.1 | 0.13            | 430   | 430    | 430    | 60              | 33              |
| 31 | 29.05.2023 | 74.9                                          | 71.0 | 85.4        | 89.9 | 0.13            | 430   | 430    | 430    | 61              | 33              |
| 32 | 05.06.2023 | 76.8                                          | 73.2 | 86.0        | 84.6 | 0.12            | 430   | 430    | 430    | 85              | 45              |
| 33 | 12.06.2023 | 70.5                                          | 66.1 | 85.3        | 83.9 | 0.12            | 430   | 430    | 430    | 90              | 51              |
| 34 | 19.06.2023 | 75.4                                          | 74.9 | 86.1        | 89.2 | 0.12            | 430   | 430    | 430    | 92              | 50              |
| 35 | 26.06.2023 | 72.5                                          | 71.1 | 83.8        | 86.3 | 0.13            | 430   | 430    | 430    | 88              | 50              |
| 36 | 03.07.2023 | 45.1                                          | 29.5 | 53.6        | 39.2 | 0.13            | 405   | 408    | 402    | 56              | 24              |
| 37 | 10.07.2023 | 56.0                                          | 49.9 | 54.3        | 59.1 | 0.13            | 405   | 408    | 402    | 64              | 21              |
| 38 | 17.07.2023 | 56.0                                          | 38.7 | 52.7        | 62.5 | 0.13            | 405   | 408    | 402    | 70              | 22              |

|    |            |      |      |      |      |      |     |     |     |    |    |
|----|------------|------|------|------|------|------|-----|-----|-----|----|----|
| 39 | 24.07.2023 | 53.3 | 51.9 | 51.8 | 65.8 | 0.13 | 405 | 408 | 402 | 66 | 21 |
| 40 | 11.08.2023 | 57.8 | 54.2 | 56.2 | 78.3 | 0.11 | 405 | 408 | 402 | 72 | 25 |

Note: The meaning of designations used in Table S3 is following:

HDA<sub>s</sub>(C<sub>5</sub>) = hydrodeasphaltization of C<sub>5</sub> asphaltenes, %;

HDA<sub>s</sub>(C<sub>7</sub>) = hydrodeasphaltization of C<sub>7</sub> asphaltenes, %;

HDM = hydrodemetalation, %;

LHSV = Liquid hourly space velocity, h<sup>-1</sup>;

WABT = Weight average bed temperature, °C;

T-R1001 = Temperature of first ebullated bed reactor (R-1001), °C;

T-R1002 = Temperature of second ebullated bed reactor (R-1001), °C;

R-1001 ΔT = ΔT of first ebullated bed reactor, °C;

R-1002 ΔT = ΔT of second ebullated bed reactor, °C

The reactors R1001, and R1002 are both ebullated bed reactors, working in series as depicted in Figure 1.

**Table S4.** Properties of H-Oil feed

|    | Date       | Feed<br>D15       | Feed<br>T50 | Feed<br>MW | Feed C5<br>asp | Feed C7<br>asp | Feed<br>Res | Feed<br>ARO | Feed<br>Sat. | Feed<br>Kw | Feed<br>Sulphur | Recycle<br>wt.% of<br>feed | FCC SLO in<br>Feed<br>wt.% of feed | Feed<br>CII (C5) | Feed<br>CII (C7) |
|----|------------|-------------------|-------------|------------|----------------|----------------|-------------|-------------|--------------|------------|-----------------|----------------------------|------------------------------------|------------------|------------------|
| No |            | g/cm <sup>3</sup> | °C          | g/mol      | wt.%           | wt.%           | wt.%        | wt.%        | wt.%         |            | wt.%            |                            |                                    |                  |                  |
| 1  | 11.04.2022 | 1.0269            | 623         | 722        | 19.7           | 17.2           | 2.5         | 61.6        | 18.7         | 11.42      | 2.68            | 0.00                       | 5.76                               | 0.62             | 0.56             |
| 2  | 23.05.2022 | 1.0146            | 619         | 717        | 19.3           | 13.8           | 5.5         | 58.8        | 22.0         | 11.54      | 2.41            | 0.00                       | 11.76                              | 0.70             | 0.56             |
| 3  | 30.05.2022 | 1.0143            | 613         | 700        | 18.3           | 12.7           | 5.6         | 59.7        | 22.0         | 11.52      | 2.21            | 0.00                       | 9.33                               | 0.68             | 0.53             |
| 4  | 06.06.2022 | 0.9911            | 602         | 682        | 18.0           | 9.3            | 8.7         | 52.4        | 29.6         | 11.74      | 2.25            | 0.00                       | 7.99                               | 0.91             | 0.64             |
| 5  | 13.06.2022 | 0.9970            | 600         | 673        | 17.6           | 11.8           | 5.8         | 54.9        | 27.5         | 11.66      | 2.23            | 0.00                       | 7.52                               | 0.82             | 0.65             |
| 6  | 20.06.2022 | 0.9911            | 577         | 615        | 13.2           | 9.6            | 3.6         | 57.1        | 29.6         | 11.63      | 2.28            | 0.00                       | 10.82                              | 0.75             | 0.65             |
| 7  | 27.06.2022 | 0.9996            | 589         | 642        | 15.7           | 10.6           | 5.1         | 57.7        | 26.6         | 11.58      | 2.43            | 0.00                       | 8.47                               | 0.73             | 0.59             |
| 8  | 04.07.2022 | 0.9826            | 579         | 625        | 16.1           | 11.9           | 4.2         | 50.9        | 33.0         | 11.74      | 2.48            | 0.00                       | 7.99                               | 0.97             | 0.81             |
| 9  | 11.07.2022 | 0.9977            | 581         | 622        | 15.1           | 10.5           | 4.6         | 57.6        | 27.3         | 11.57      | 2.45            | 0.00                       | 7.99                               | 0.74             | 0.61             |
| 10 | 05.09.2022 | 1.0056            | 597         | 660        | 19.2           | 11.9           | 7.3         | 56.2        | 24.6         | 11.55      | 2.76            | 0.00                       | 8.42                               | 0.78             | 0.58             |
| 11 | 03.10.2022 | 1.0000            | 549         | 545        | 15.9           | 9.76           | 6.1         | 57.6        | 26.5         | 11.40      | 2.58            | 0.00                       | 7.20                               | 0.74             | 0.57             |
| 12 | 28.11.2022 | 1.0002            | 590         | 644        | 17.6           | 12.1           | 5.5         | 56.0        | 26.4         | 11.58      | 2.52            | 0.00                       | 8.51                               | 0.79             | 0.63             |
| 13 | 03.01.2023 | 1.0080            | 600         | 667        | 17.0           | 13.6           | 3.3         | 59.1        | 23.9         | 11.53      | 2.48            | 0.00                       | 5.40                               | 0.69             | 0.60             |
| 14 | 30.01.2023 | 1.011             | 601         | 668        | 18.4           | 12.5           | 5.9         | 58.5        | 23.1         | 11.51      | 2.43            | 0.00                       | 11.68                              | 0.71             | 0.55             |
| 15 | 06.02.2023 | 1.0028            | 594         | 653        | 15.2           | 11.0           | 4.3         | 59.2        | 25.5         | 11.57      | 2.00            | 2.51                       | 16.56                              | 0.69             | 0.57             |
| 16 | 13.02.2023 | 1.0027            | 577         | 609        | 15.9           | 9.8            | 6.1         | 58.5        | 25.6         | 11.49      | 1.96            | 5.06                       | 12.65                              | 0.71             | 0.55             |
| 17 | 20.02.2023 | 1.002             | 581         | 619        | 16.7           | 11.1           | 5.5         | 57.5        | 25.8         | 11.52      | 2.05            | 6.77                       | 6.34                               | 0.74             | 0.59             |
| 18 | 27.02.2023 | 1.002             | 581         | 620        | 20.1           | 11.2           | 8.9         | 53.9        | 26.0         | 11.52      | 2.07            | 8.34                       | 7.23                               | 0.85             | 0.59             |
| 19 | 06.03.2023 | 0.9967            | 572         | 600        | 16.3           | 10.8           | 5.5         | 56.1        | 27.6         | 11.54      | 1.99            | 8.09                       | 6.28                               | 0.78             | 0.62             |
| 20 | 13.03.2023 | 1.0000            | 559         | 567        | 15.6           | 9.5            | 6.0         | 57.9        | 26.5         | 11.44      | 1.82            | 11.86                      | 9.37                               | 0.73             | 0.56             |
| 21 | 20.03.2023 | 1.0055            | 577         | 608        | 15.8           | 9.9            | 5.9         | 59.6        | 24.7         | 11.46      | 2.23            | 3.05                       | 15.78                              | 0.68             | 0.53             |
| 22 | 27.03.2023 | 1.0017            | 579         | 615        | 17.5           | 12.2           | 5.4         | 56.6        | 25.9         | 11.51      | 2.30            | 12.27                      | 7.84                               | 0.77             | 0.61             |
| 23 | 03.04.2023 | 1.010             | 584         | 623        | 18.6           | 12.6           | 6.0         | 58.0        | 23.4         | 11.45      | 2.26            | 17.74                      | 5.86                               | 0.72             | 0.56             |
| 24 | 10.04.2023 | 1.0164            | 573         | 592        | 15.5           | 11.0           | 4.4         | 63.1        | 21.5         | 11.32      | 2.07            | 15.75                      | 14.78                              | 0.59             | 0.48             |

|    |            |        |     |       |      |      |     |      |      |       |      |       |       |      |      |
|----|------------|--------|-----|-------|------|------|-----|------|------|-------|------|-------|-------|------|------|
| 25 | 18.04.2023 | 0.9616 | 511 | 482   | 12.5 | 8.9  | 3.6 | 44.4 | 43.1 | 11.67 | 2.07 | 7.65  | 0.00  | 1.25 | 1.08 |
| 26 | 24.04.2023 | 0.9596 | 513 | 487   | 14.1 | 8.0  | 6.2 | 41.7 | 44.2 | 11.70 | 2.08 | 7.79  | 0.00  | 1.40 | 1.09 |
| 27 | 28.04.2023 | 0.9721 | 529 | 514   | 16.2 | 10.7 | 5.6 | 46.0 | 37.7 | 11.63 | 2.75 | 8.51  | 4.67  | 1.17 | 0.94 |
| 28 | 09.05.2023 | 1.0061 | 552 | 549   | 15.8 | 11.2 | 4.7 | 59.7 | 24.5 | 11.34 | 2.45 | 9.36  | 15.24 | 0.68 | 0.55 |
| 29 | 15.05.2023 | 1.0132 | 594 | 647   | 19.4 | 13.0 | 6.4 | 58.3 | 22.4 | 11.45 | 2.88 | 8.01  | 11.63 | 0.72 | 0.55 |
| 30 | 22.05.2023 | 1.0196 | 595 | 646   | 18.6 | 14.9 | 3.8 | 60.8 | 20.6 | 11.38 | 2.80 | 10.14 | 8.73  | 0.64 | 0.55 |
| 31 | 29.05.2023 | 1.0180 | 590 | 634   | 18.3 | 13.1 | 5.2 | 60.7 | 21.0 | 11.38 | 2.63 | 10.54 | 8.51  | 0.65 | 0.52 |
| 32 | 05.06.2023 | 1.0195 | 584 | 618   | 18.3 | 12.2 | 6.1 | 61.1 | 20.6 | 11.33 | 2.49 | 14.75 | 10.90 | 0.64 | 0.49 |
| 33 | 12.06.2023 | 1.0275 | 590 | 629   | 18.2 | 13.6 | 4.6 | 63.2 | 18.6 | 11.27 | 2.60 | 12.35 | 11.05 | 0.58 | 0.47 |
| 34 | 19.06.2023 | 1.0302 | 589 | 625   | 18.1 | 13.9 | 4.2 | 63.9 | 18.0 | 11.24 | 2.40 | 12.89 | 11.14 | 0.56 | 0.47 |
| 35 | 26.06.2023 | 1.0269 | 591 | 632   | 21.0 | 13.2 | 7.8 | 60.2 | 18.7 | 11.28 | 2.20 | 12.24 | 10.29 | 0.66 | 0.47 |
| 36 | 03.07.2023 | 1.014  | 615 | 706   | 20.7 | 11.4 | 9.3 | 57.2 | 22.1 | 11.53 | 2.9  | 0.00  | 0.00  | 0.75 | 0.50 |
| 37 | 10.07.2023 | 1.0064 | 612 | 702   | 20.7 | 11.4 | 9.3 | 54.9 | 24.4 | 11.61 | 2.8  | 0.00  | 0.00  | 0.82 | 0.56 |
| 38 | 17.07.2023 | 1.0098 | 608 | 688   | 18.6 | 9.1  | 9.5 | 58.1 | 23.4 | 11.55 | 2.8  | 0.00  | 0.00  | 0.72 | 0.48 |
| 39 | 24.07.2023 | 1.0064 | 612 | 702   | 17.3 | 11.0 | 6.3 | 58.3 | 24.4 | 11.61 | 2.8  | 0.00  | 0.00  | 0.71 | 0.55 |
|    | min        | 0.9596 | 511 | 482.0 | 12.5 | 8.0  | 2.5 | 41.7 | 18.0 | 11.2  | 1.8  | 0.0   | 0.0   | 0.56 | 0.47 |
|    | max        | 1.0302 | 623 | 721.5 | 21.0 | 17.2 | 9.5 | 63.9 | 44.2 | 11.7  | 2.9  | 17.7  | 16.6  | 1.40 | 1.09 |

Note: The meaning of designations used in Table S4 is following:

Feed D15 = density of H-Oil feed, g/cm<sup>3</sup>;

Feed T50 = boiling point of 50% of evaporate according to the HTSD (ASTM D7169 of H-Oil feed, °C;

Feed MW = Molecular weight of H-Oil feed, g/mol;

Feed C5 asp. = Content of C<sub>5</sub> asphaltenes in H-Oil feed, wt.%;

Feed C7 asp. = Content of C<sub>7</sub> asphaltenes in H-Oil feed, wt.%;

Feed Res = Content of resins in H-Oil feed, wt.%;

Feed ARO = Content of aromatic compounds in H-Oil feed, wt.%;

Feed Sat = Content of saturated compounds in H-Oil feed, wt.%;

Feed Kw = Kw-characterization factor of H-Oil feed;

Feed Sulphur = Content of sulphur in H-Oil feed;

Recycle wt.% of feed = Content of recycle from partially blended fuel oil in H-Oil feed, wt.% of total feed;

FCC SLO in Feed = Content of fluid catalytic cracking slurry oil in H-Oil feed, wt.% of total feed;

Feed CII (C5) = Colloidal instability index of H-Oil feed determined on the base of C<sub>5</sub> asphaltene content;

Feed CII (C7) = Colloidal instability index of H-Oil feed determined on the base of C<sub>7</sub> asphaltene content;

The colloidal instability index is calculated by the expression:

$$CII = \frac{\text{Saturates} + \text{Asphaltenes}}{\text{Aromatics} + \text{Resins}}$$



**Table S5.** High temperature simulated distillation (HTSD) data of H-Oil feed

| HTSD of H-Oil<br>feed | 11.04.2022 | 23.05.2022 | 30.05.2022 | 06.06.2022 | 13.06.2022 | 20.06.2022 | 27.06.2022 | 04.07.2022 | 11.07.2022 | 05.09.2022 | 03.10.2022 | 28.11.2022 | 03.01.2023 |
|-----------------------|------------|------------|------------|------------|------------|------------|------------|------------|------------|------------|------------|------------|------------|
| wt. %                 | °C         |
| IBP 0.5               | 380        | 404        | 369        | 339        | 367        | 266        | 270        | 293        | 274        | 183        | 173        | 217        | 221        |
| 1                     | 400        | 412        | 381        | 358        | 381        | 281        | 283        | 308        | 286        | 200        | 194        | 242        | 246        |
| 2                     | 422        | 425        | 397        | 380        | 396        | 304        | 308        | 328        | 309        | 220        | 214        | 267        | 271        |
| 3                     | 437        | 435        | 408        | 394        | 407        | 323        | 328        | 344        | 329        | 243        | 231        | 286        | 290        |
| 4                     | 448        | 443        | 418        | 405        | 416        | 338        | 346        | 356        | 346        | 261        | 243        | 305        | 309        |
| 5                     | 463        | 452        | 429        | 414        | 425        | 350        | 359        | 366        | 359        | 296        | 255        | 320        | 326        |
| 6                     | 472        | 465        | 436        | 423        | 433        | 359        | 370        | 374        | 371        | 340        | 265        | 332        | 341        |
| 7                     | 480        | 473        | 443        | 431        | 439        | 367        | 381        | 383        | 382        | 364        | 275        | 345        | 353        |
| 8                     | 489        | 480        | 451        | 437        | 444        | 376        | 391        | 391        | 391        | 380        | 286        | 355        | 368        |
| 9                     | 497        | 488        | 462        | 443        | 450        | 384        | 398        | 397        | 398        | 393        | 295        | 367        | 381        |
| 10                    | 503        | 497        | 471        | 449        | 460        | 392        | 406        | 403        | 405        | 406        | 306        | 376        | 393        |
| 11                    | 508        | 502        | 477        | 459        | 468        | 398        | 413        | 409        | 411        | 417        | 314        | 385        | 406        |
| 12                    | 514        | 508        | 484        | 467        | 474        | 404        | 421        | 415        | 418        | 427        | 324        | 394        | 418        |
| 13                    | 519        | 513        | 492        | 473        | 479        | 410        | 428        | 421        | 424        | 437        | 330        | 404        | 430        |
| 14                    | 524        | 519        | 498        | 479        | 485        | 416        | 434        | 427        | 430        | 447        | 338        | 414        | 441        |
| 15                    | 529        | 524        | 504        | 485        | 491        | 422        | 439        | 432        | 435        | 455        | 346        | 423        | 451        |
| 16                    | 533        | 528        | 508        | 491        | 497        | 428        | 445        | 437        | 440        | 464        | 353        | 432        | 461        |
| 17                    | 537        | 532        | 514        | 497        | 501        | 434        | 450        | 441        | 444        | 472        | 359        | 441        | 470        |
| 18                    | 540        | 536        | 519        | 502        | 506        | 438        | 460        | 445        | 448        | 480        | 366        | 451        | 479        |
| 19                    | 544        | 540        | 523        | 506        | 510        | 443        | 468        | 450        | 456        | 487        | 371        | 459        | 487        |
| 20                    | 547        | 543        | 527        | 510        | 514        | 447        | 473        | 458        | 464        | 494        | 377        | 468        | 494        |
| 21                    | 551        | 546        | 531        | 515        | 519        | 454        | 479        | 466        | 469        | 500        | 382        | 477        | 500        |
| 22                    | 554        | 550        | 535        | 519        | 523        | 462        | 485        | 470        | 474        | 505        | 387        | 485        | 506        |
| 23                    | 557        | 553        | 539        | 523        | 527        | 468        | 491        | 475        | 478        | 511        | 392        | 492        | 511        |
| 24                    | 560        | 556        | 542        | 527        | 530        | 473        | 497        | 479        | 483        | 515        | 398        | 498        | 516        |

|    |     |     |     |     |     |     |     |     |     |     |     |     |     |
|----|-----|-----|-----|-----|-----|-----|-----|-----|-----|-----|-----|-----|-----|
| 25 | 563 | 559 | 545 | 531 | 534 | 478 | 502 | 485 | 489 | 520 | 403 | 504 | 520 |
| 26 | 565 | 562 | 549 | 534 | 537 | 483 | 506 | 490 | 495 | 524 | 409 | 510 | 525 |
| 27 | 568 | 565 | 552 | 538 | 541 | 489 | 511 | 496 | 499 | 529 | 414 | 515 | 529 |
| 28 | 570 | 567 | 556 | 541 | 544 | 495 | 516 | 500 | 504 | 533 | 419 | 519 | 533 |
| 29 | 573 | 570 | 559 | 544 | 547 | 499 | 520 | 504 | 508 | 536 | 425 | 524 | 536 |
| 30 | 575 | 572 | 561 | 548 | 550 | 504 | 525 | 508 | 512 | 540 | 431 | 528 | 540 |
| 31 | 578 | 575 | 564 | 551 | 553 | 508 | 529 | 513 | 516 | 543 | 437 | 532 | 543 |
| 32 | 580 | 577 | 567 | 554 | 557 | 512 | 532 | 517 | 521 | 547 | 444 | 536 | 547 |
| 33 | 583 | 580 | 570 | 557 | 559 | 517 | 536 | 521 | 525 | 550 | 450 | 540 | 550 |
| 34 | 585 | 582 | 572 | 560 | 562 | 521 | 540 | 525 | 528 | 554 | 457 | 543 | 554 |
| 35 | 587 | 584 | 575 | 563 | 565 | 525 | 543 | 529 | 532 | 557 | 464 | 547 | 557 |
| 36 | 590 | 587 | 577 | 565 | 568 | 529 | 547 | 533 | 536 | 560 | 471 | 550 | 560 |
| 37 | 592 | 589 | 580 | 568 | 570 | 533 | 550 | 537 | 539 | 563 | 479 | 553 | 563 |
| 38 | 594 | 592 | 583 | 571 | 573 | 537 | 554 | 540 | 543 | 566 | 486 | 557 | 566 |
| 39 | 597 | 594 | 585 | 573 | 575 | 541 | 557 | 544 | 546 | 568 | 493 | 560 | 568 |
| 40 | 599 | 596 | 588 | 576 | 578 | 544 | 560 | 547 | 550 | 571 | 499 | 563 | 571 |
| 41 | 601 | 598 | 590 | 578 | 581 | 548 | 563 | 551 | 553 | 574 | 505 | 565 | 573 |
| 42 | 604 | 601 | 593 | 581 | 583 | 551 | 566 | 554 | 557 | 576 | 511 | 568 | 576 |
| 43 | 606 | 603 | 595 | 584 | 586 | 555 | 569 | 557 | 560 | 579 | 516 | 571 | 579 |
| 44 | 609 | 606 | 598 | 586 | 588 | 558 | 572 | 561 | 563 | 582 | 521 | 574 | 581 |
| 45 | 611 | 608 | 600 | 589 | 591 | 561 | 575 | 564 | 566 | 584 | 527 | 576 | 584 |
| 46 | 613 | 610 | 603 | 591 | 593 | 565 | 577 | 567 | 569 | 587 | 531 | 579 | 587 |
| 47 | 616 | 613 | 605 | 594 | 596 | 568 | 580 | 570 | 572 | 590 | 536 | 582 | 589 |
| 48 | 618 | 615 | 608 | 596 | 598 | 571 | 583 | 573 | 575 | 592 | 540 | 584 | 592 |
| 49 | 620 | 617 | 610 | 599 | 601 | 574 | 586 | 576 | 578 | 595 | 545 | 587 | 594 |
| 50 | 623 | 619 | 613 | 602 | 603 | 577 | 589 | 579 | 581 | 597 | 549 | 590 | 597 |
| 51 | 625 | 622 | 615 | 604 | 606 | 580 | 591 | 582 | 584 | 600 | 553 | 592 | 599 |
| 52 | 627 | 624 | 618 | 607 | 609 | 583 | 594 | 585 | 587 | 602 | 557 | 595 | 602 |
| 53 | 630 | 626 | 620 | 610 | 611 | 586 | 597 | 587 | 590 | 605 | 561 | 597 | 604 |

|    |     |     |     |     |     |     |     |     |     |     |     |     |     |
|----|-----|-----|-----|-----|-----|-----|-----|-----|-----|-----|-----|-----|-----|
| 54 | 632 | 629 | 623 | 612 | 614 | 589 | 600 | 590 | 593 | 607 | 565 | 600 | 607 |
| 55 | 634 | 631 | 625 | 615 | 616 | 592 | 603 | 593 | 595 | 610 | 568 | 602 | 609 |
| 56 | 636 | 633 | 628 | 618 | 619 | 595 | 606 | 596 | 598 | 612 | 571 | 605 | 612 |
| 57 | 638 | 635 | 630 | 620 | 621 | 598 | 609 | 599 | 601 | 615 | 575 | 608 | 614 |
| 58 | 640 | 637 | 632 | 623 | 624 | 601 | 611 | 602 | 604 | 617 | 578 | 610 | 617 |
| 59 | 643 | 640 | 635 | 626 | 627 | 604 | 614 | 605 | 607 | 620 | 582 | 613 | 619 |
| 60 | 645 | 642 | 637 | 628 | 629 | 607 | 617 | 608 | 610 | 622 | 585 | 615 | 622 |
| 61 | 647 | 644 | 639 | 631 | 632 | 610 | 620 | 611 | 613 | 625 | 589 | 618 | 624 |
| 62 | 649 | 646 | 642 | 633 | 634 | 613 | 623 | 614 | 616 | 627 | 592 | 620 | 627 |
| 63 | 651 | 648 | 644 | 636 | 636 | 616 | 626 | 617 | 619 | 629 | 595 | 623 | 629 |
| 64 | 653 | 650 | 647 | 638 | 639 | 619 | 629 | 620 | 622 | 632 | 599 | 626 | 631 |
| 65 | 655 | 653 | 649 | 641 | 641 | 622 | 631 | 623 | 626 | 634 | 602 | 628 | 634 |
| 66 | 657 | 654 | 651 | 643 | 644 | 625 | 634 | 626 | 629 | 636 | 605 | 631 | 636 |
| 67 | 659 | 656 | 654 | 646 | 646 | 628 | 637 | 629 | 631 | 638 | 609 | 633 | 638 |
| 68 | 662 | 658 | 656 | 648 | 649 | 631 | 640 | 632 | 634 | 641 | 612 | 635 | 641 |
| 69 | 664 | 661 | 658 | 651 | 651 | 634 | 642 | 635 | 637 | 643 | 615 | 638 | 643 |
| 70 | 666 | 663 | 660 | 653 | 653 | 637 | 645 | 638 | 640 | 645 | 619 | 640 | 645 |
| 71 | 669 | 666 | 663 | 655 | 655 | 640 | 648 | 641 | 643 | 648 | 622 | 643 | 648 |
| 72 | 671 | 668 | 666 | 657 | 658 | 643 | 651 | 644 | 646 | 650 | 625 | 645 | 650 |
| 73 | 673 | 671 | 668 | 660 | 660 | 646 | 653 | 647 | 649 | 652 | 629 | 648 | 652 |
| 74 | 675 | 673 | 671 | 662 | 663 | 649 | 656 | 650 | 652 | 655 | 632 | 650 | 654 |
| 75 | 678 | 675 | 673 | 665 | 666 | 652 | 659 | 653 | 655 | 657 | 635 | 653 | 656 |
| 76 | 681 | 678 | 676 | 668 | 668 | 655 | 662 | 656 | 657 | 659 | 638 | 655 | 659 |
| 77 | 683 | 680 | 679 | 670 | 671 | 657 | 665 | 659 | 660 | 662 | 641 | 657 | 662 |
| 78 | 685 | 683 | 681 | 673 | 673 | 661 | 668 | 662 | 664 | 665 | 644 | 660 | 664 |
| 79 | 688 | 685 | 684 | 675 | 676 | 664 | 671 | 665 | 667 | 668 | 648 | 663 | 667 |
| 80 | 690 | 688 | 687 | 678 | 679 | 667 | 674 | 669 | 670 | 671 | 651 | 667 | 670 |
| 81 | 693 | 691 | 690 | 681 | 682 | 671 | 678 | 672 | 673 | 674 | 654 | 670 | 673 |
| 82 | 695 | 693 | 692 | 684 | 685 | 674 | 681 | 676 | 677 | 677 | 657 | 673 | 676 |

|                                         |            |            |            |            |            |            |            |            |            |        |            |            |            |
|-----------------------------------------|------------|------------|------------|------------|------------|------------|------------|------------|------------|--------|------------|------------|------------|
| 83                                      | 698        | 695        | 695        | 686        | 688        | 677        | 684        | 680        | 681        | 681    | 660        | 676        | 680        |
| 84                                      | 701        | 699        | 698        | 689        | 691        | 681        | 689        | 683        | 684        | 684    | 664        | 680        | 683        |
| 85                                      | 703        | 702        | 701        | 692        | 694        | 684        | 691        | 687        | 688        | 687    | 669        | 683        | 686        |
| 86                                      | 706        | 704        | 704        | 695        | 697        | 688        | 694        | 691        | 691        | 691    | 673        | 687        | 689        |
| 87                                      | 709        | 707        | 707        | 698        | 701        | 692        | 698        | 694        | 695        | 694    | 677        | 691        | 693        |
| 88                                      | 712        | 710        | 710        | 702        | 704        | 695        | 702        | 698        | 699        | 697    | 682        | 694        | 695        |
| 89                                      | 716        | 714        | 714        | 705        | 707        | 699        | 706        | 702        | 703        | 701    | 686        | 697        | 699        |
| <b>90</b>                               | <b>719</b> | <b>717</b> | <b>717</b> | <b>709</b> | <b>711</b> | <b>703</b> | <b>710</b> | <b>706</b> | <b>707</b> |        | <b>691</b> | <b>701</b> | <b>702</b> |
| 91                                      | 730        | 723        | 724        | 713        | 715        | 707        | 714        | 711        | 711        |        | 695        |            | 706        |
| 92                                      | 744        | 738        | 739        |            | 719        | 712        | 718        |            | 716        |        | 700        |            | 709        |
| 93                                      | 758        | 753        | 754        |            | 733        | 717        | 732        |            | 723        |        | 704        |            | 713        |
| 94                                      | 773        | 769        | 770        |            | 751        | 729        |            |            |            |        | 709        |            | 717        |
| 95                                      | 789        | 786        | 787        |            |            |            |            |            |            |        | 714        |            | 722        |
| 96                                      | 809        | 806        | 808        |            |            |            |            |            |            |        | 720        |            | 731        |
| 97                                      | 835        | 833        | 835        |            |            |            |            |            |            |        | 730        |            | 746        |
| 98                                      | 872        |            | 873        |            |            |            |            |            |            |        | 742        |            |            |
| 99                                      | 929        |            | 930        |            |            |            |            |            |            |        |            |            |            |
| FBP 99,5                                | 972        |            | 971        |            |            |            |            |            |            |        |            |            |            |
| %Recovery                               | 106.090    | 97.461     | 100.090    | 91.233     | 94.034     | 94.510     | 93.984     | 91.532     | 93.565     | 89.271 | 98.097     | 90.368     | 97.315     |
|                                         |            |            |            |            |            |            |            |            |            |        |            |            |            |
| Content of material boiling below 360°C | -          | -          | -          | 2.11       | -          | 6.13       | 5.09       | 4.40       | 5.08       | 6.83   | 17.14      | 8.42       | 7.47       |
| Content of material boiling below 540°C | 18.00      | 19.00      | 23.33      | 26.75      | 38.75      | 34.00      | 38.00      | 37.25      | 30.00      | 48.00  | 33.00      | 30.00      | 26.67      |
| Content of material boiling above 540°C | 82.00      | 81.00      | 76.67      | 73.25      | 61.25      | 66.00      | 62.00      | 62.75      | 70.00      | 52.00  | 67.00      | 70.00      | 73.33      |

|                            |       |       |       |       |       |       |       |       |       |       |       |       |       |
|----------------------------|-------|-------|-------|-------|-------|-------|-------|-------|-------|-------|-------|-------|-------|
| T50% - 540 +<br>Percentage | 59.00 | 59.50 | 61.67 | 63.38 | 69.38 | 67.00 | 69.00 | 68.63 | 65.00 | 74.00 | 66.50 | 65.00 | 63.33 |
| T50% - 540 +<br>Degree     | 643.0 | 641.0 | 641.0 | 636.8 | 651.8 | 628.0 | 642.0 | 633.9 | 626.0 | 655.0 | 607.0 | 628.0 | 629.7 |

**Continuation of  
Table S5**

| HTSD of H-Oil<br>feed | 30.01.2023 | 06.02.2023 | 13.02.2023 | 20.02.2023 | 27.02.2023 | 06.03.2023 | 13.03.2023 | 20.03.2023 | 27.03.2023 | 03.04.2023 | 10.04.2023 | 18.04.2023 | 24.04.2023 |
|-----------------------|------------|------------|------------|------------|------------|------------|------------|------------|------------|------------|------------|------------|------------|
| wt. %                 | °C         |
| IBP 0.5               | 273        | 177        | 241        | 233        | 270        | 235        | 219        | 225        | 206        | 216        | 196        | 181        | 253        |
| 1                     | 294        | 202        | 260        | 253        | 282        | 256        | 246        | 246        | 225        | 236        | 208        | 202        | 287        |
| 2                     | 326        | 237        | 282        | 278        | 303        | 280        | 269        | 270        | 247        | 250        | 229        | 236        | 321        |
| 3                     | 347        | 253        | 298        | 297        | 318        | 296        | 283        | 290        | 264        | 266        | 243        | 261        | 337        |
| 4                     | 364        | 269        | 313        | 313        | 331        | 310        | 295        | 309        | 281        | 282        | 256        | 287        | 348        |
| 5                     | 379        | 282        | 325        | 327        | 341        | 322        | 307        | 323        | 298        | 297        | 268        | 310        | 357        |
| 6                     | 392        | 296        | 335        | 337        | 351        | 331        | 316        | 334        | 314        | 313        | 280        | 326        | 364        |
| 7                     | 406        | 307        | 343        | 347        | 359        | 339        | 325        | 343        | 328        | 326        | 292        | 338        | 371        |
| 8                     | 418        | 319        | 352        | 356        | 368        | 348        | 332        | 352        | 339        | 338        | 306        | 347        | 376        |
| 9                     | 430        | 327        | 359        | 365        | 375        | 355        | 339        | 360        | 351        | 349        | 317        | 355        | 381        |
| <b>10</b>             | <b>441</b> | <b>336</b> | <b>368</b> | <b>373</b> | <b>382</b> | <b>362</b> | <b>347</b> | <b>369</b> | <b>362</b> | <b>360</b> | <b>329</b> | <b>362</b> | <b>385</b> |
| 11                    | 452        | 345        | 374        | 380        | 389        | 369        | 354        | 375        | 373        | 372        | 338        | 368        | 389        |
| 12                    | 461        | 351        | 380        | 388        | 396        | 375        | 359        | 383        | 384        | 384        | 349        | 373        | 393        |
| 13                    | 470        | 360        | 387        | 395        | 403        | 381        | 367        | 389        | 395        | 395        | 357        | 378        | 397        |
| 14                    | 479        | 367        | 393        | 402        | 410        | 387        | 373        | 397        | 406        | 407        | 368        | 382        | 401        |
| 15                    | 486        | 374        | 399        | 410        | 417        | 393        | 378        | 404        | 417        | 419        | 377        | 386        | 405        |
| 16                    | 493        | 381        | 406        | 417        | 424        | 399        | 385        | 412        | 426        | 430        | 386        | 390        | 408        |
| 17                    | 499        | 387        | 412        | 424        | 430        | 406        | 390        | 419        | 436        | 440        | 396        | 395        | 412        |

|    |     |     |     |     |     |     |     |     |     |     |     |     |     |
|----|-----|-----|-----|-----|-----|-----|-----|-----|-----|-----|-----|-----|-----|
| 18 | 504 | 393 | 419 | 431 | 437 | 412 | 397 | 426 | 445 | 451 | 407 | 398 | 415 |
| 19 | 509 | 401 | 425 | 439 | 444 | 418 | 404 | 433 | 453 | 459 | 416 | 402 | 417 |
| 20 | 514 | 407 | 431 | 446 | 450 | 424 | 410 | 441 | 461 | 468 | 425 | 406 | 420 |
| 21 | 519 | 414 | 437 | 453 | 457 | 430 | 417 | 448 | 469 | 476 | 434 | 410 | 423 |
| 22 | 523 | 421 | 444 | 460 | 464 | 436 | 423 | 455 | 476 | 483 | 443 | 413 | 426 |
| 23 | 527 | 427 | 450 | 467 | 470 | 443 | 429 | 462 | 483 | 490 | 451 | 416 | 429 |
| 24 | 531 | 434 | 457 | 475 | 477 | 449 | 435 | 469 | 489 | 496 | 459 | 419 | 431 |
| 25 | 534 | 441 | 463 | 482 | 484 | 455 | 442 | 476 | 494 | 501 | 466 | 423 | 434 |
| 26 | 538 | 449 | 470 | 488 | 490 | 462 | 448 | 483 | 499 | 506 | 474 | 426 | 437 |
| 27 | 541 | 456 | 477 | 494 | 496 | 469 | 454 | 489 | 504 | 511 | 481 | 429 | 440 |
| 28 | 544 | 463 | 484 | 500 | 501 | 476 | 461 | 494 | 508 | 515 | 488 | 432 | 443 |
| 29 | 547 | 471 | 490 | 506 | 507 | 482 | 467 | 500 | 513 | 519 | 494 | 435 | 446 |
| 30 | 550 | 478 | 496 | 511 | 512 | 488 | 473 | 505 | 517 | 523 | 500 | 439 | 449 |
| 31 | 554 | 485 | 502 | 516 | 516 | 494 | 479 | 509 | 521 | 527 | 505 | 442 | 452 |
| 32 | 557 | 492 | 508 | 521 | 521 | 500 | 485 | 514 | 524 | 531 | 510 | 446 | 455 |
| 33 | 559 | 498 | 513 | 525 | 525 | 506 | 490 | 518 | 528 | 534 | 515 | 449 | 458 |
| 34 | 562 | 504 | 518 | 530 | 530 | 511 | 496 | 522 | 532 | 538 | 519 | 453 | 461 |
| 35 | 565 | 510 | 523 | 534 | 534 | 516 | 501 | 526 | 535 | 541 | 523 | 456 | 464 |
| 36 | 567 | 515 | 528 | 538 | 538 | 520 | 505 | 530 | 538 | 544 | 528 | 460 | 468 |
| 37 | 570 | 520 | 533 | 541 | 541 | 525 | 510 | 534 | 542 | 547 | 532 | 463 | 471 |
| 38 | 572 | 525 | 537 | 545 | 545 | 529 | 514 | 538 | 545 | 550 | 535 | 467 | 474 |
| 39 | 575 | 529 | 541 | 548 | 548 | 534 | 519 | 541 | 548 | 553 | 539 | 471 | 477 |
| 40 | 577 | 534 | 544 | 552 | 552 | 537 | 523 | 545 | 551 | 556 | 542 | 474 | 481 |
| 41 | 580 | 538 | 548 | 555 | 555 | 541 | 527 | 548 | 554 | 559 | 546 | 478 | 484 |
| 42 | 582 | 541 | 552 | 558 | 558 | 545 | 531 | 552 | 557 | 562 | 549 | 482 | 487 |
| 43 | 585 | 545 | 556 | 562 | 562 | 549 | 535 | 555 | 560 | 565 | 552 | 485 | 490 |
| 44 | 587 | 549 | 559 | 565 | 565 | 552 | 538 | 558 | 563 | 568 | 556 | 489 | 493 |
| 45 | 589 | 553 | 562 | 567 | 568 | 556 | 542 | 562 | 566 | 570 | 559 | 492 | 496 |
| 46 | 592 | 556 | 565 | 570 | 570 | 559 | 545 | 565 | 569 | 573 | 562 | 496 | 500 |

|    |     |     |     |     |     |     |     |     |     |     |     |     |     |
|----|-----|-----|-----|-----|-----|-----|-----|-----|-----|-----|-----|-----|-----|
| 47 | 594 | 559 | 568 | 573 | 573 | 562 | 549 | 568 | 571 | 576 | 565 | 500 | 503 |
| 48 | 596 | 563 | 571 | 576 | 576 | 566 | 553 | 571 | 574 | 578 | 568 | 504 | 506 |
| 49 | 599 | 566 | 574 | 579 | 579 | 569 | 556 | 574 | 577 | 581 | 570 | 507 | 510 |
| 50 | 601 | 569 | 577 | 581 | 581 | 572 | 559 | 577 | 579 | 584 | 573 | 511 | 513 |
| 51 | 603 | 572 | 580 | 584 | 584 | 574 | 563 | 580 | 582 | 586 | 576 | 515 | 517 |
| 52 | 606 | 575 | 583 | 587 | 587 | 577 | 566 | 583 | 585 | 589 | 579 | 519 | 520 |
| 53 | 608 | 578 | 586 | 590 | 590 | 580 | 569 | 586 | 588 | 592 | 582 | 522 | 524 |
| 54 | 610 | 581 | 589 | 593 | 592 | 583 | 572 | 589 | 591 | 594 | 584 | 526 | 527 |
| 55 | 613 | 584 | 592 | 595 | 595 | 586 | 575 | 592 | 593 | 597 | 587 | 530 | 531 |
| 56 | 615 | 587 | 595 | 598 | 598 | 589 | 578 | 595 | 596 | 600 | 590 | 534 | 535 |
| 57 | 617 | 590 | 597 | 601 | 601 | 592 | 581 | 597 | 599 | 602 | 593 | 538 | 539 |
| 58 | 620 | 593 | 600 | 604 | 603 | 595 | 584 | 600 | 602 | 605 | 596 | 542 | 542 |
| 59 | 622 | 596 | 603 | 607 | 606 | 598 | 587 | 603 | 604 | 608 | 599 | 546 | 546 |
| 60 | 624 | 599 | 606 | 610 | 609 | 601 | 591 | 607 | 607 | 611 | 602 | 550 | 550 |
| 61 | 626 | 602 | 609 | 612 | 612 | 604 | 594 | 609 | 610 | 613 | 605 | 554 | 554 |
| 62 | 629 | 605 | 612 | 615 | 614 | 607 | 597 | 612 | 613 | 616 | 608 | 558 | 558 |
| 63 | 631 | 608 | 615 | 618 | 617 | 610 | 600 | 615 | 616 | 619 | 610 | 562 | 562 |
| 64 | 633 | 611 | 618 | 621 | 620 | 613 | 603 | 618 | 619 | 622 | 613 | 566 | 566 |
| 65 | 635 | 614 | 621 | 624 | 623 | 616 | 606 | 621 | 622 | 625 | 616 | 570 | 569 |
| 66 | 637 | 617 | 624 | 627 | 626 | 619 | 609 | 624 | 624 | 627 | 619 | 574 | 573 |
| 67 | 639 | 620 | 627 | 630 | 628 | 622 | 613 | 627 | 627 | 630 | 622 | 578 | 577 |
| 68 | 641 | 623 | 630 | 632 | 631 | 625 | 616 | 630 | 630 | 633 | 625 | 582 | 581 |
| 69 | 643 | 626 | 633 | 635 | 634 | 628 | 619 | 633 | 633 | 635 | 628 | 586 | 585 |
| 70 | 645 | 629 | 635 | 638 | 636 | 630 | 622 | 635 | 635 | 638 | 631 | 591 | 589 |
| 71 | 647 | 632 | 638 | 640 | 639 | 633 | 625 | 638 | 638 | 640 | 634 | 595 | 593 |
| 72 | 649 | 635 | 641 | 643 | 642 | 636 | 628 | 641 | 641 | 643 | 637 | 599 | 597 |
| 73 | 651 | 637 | 644 | 646 | 644 | 639 | 631 | 643 | 644 | 646 | 639 | 603 | 601 |
| 74 | 653 | 640 | 647 | 649 | 647 | 642 | 634 | 646 | 646 | 649 | 642 | 608 | 606 |
| 75 | 655 | 643 | 649 | 652 | 649 | 644 | 637 | 649 | 649 | 651 | 645 | 612 | 610 |

|           |        |         |        |        |        |        |        |        |        |        |        |        |        |
|-----------|--------|---------|--------|--------|--------|--------|--------|--------|--------|--------|--------|--------|--------|
| 76        | 657    | 646     | 652    | 654    | 652    | 647    | 640    | 651    | 652    | 654    | 648    | 616    | 614    |
| 77        | 659    | 649     | 655    | 657    | 654    | 650    | 643    | 654    | 654    | 656    | 651    | 621    | 618    |
| 78        | 662    | 652     | 657    | 659    | 657    | 653    | 646    | 656    | 657    | 659    | 654    | 625    | 623    |
| 79        | 664    | 654     | 660    | 663    | 660    | 655    | 649    | 659    | 660    | 662    | 656    | 629    | 627    |
| 80        | 667    | 660     | 663    | 666    | 663    | 658    | 652    | 662    | 663    | 665    | 659    | 633    | 631    |
| 81        | 670    | 663     | 667    | 669    | 666    | 661    | 655    | 665    | 666    | 668    | 663    | 638    | 635    |
| 82        | 672    | 667     | 670    | 672    | 669    | 664    | 657    | 669    | 670    | 672    | 666    | 642    | 640    |
| 83        | 675    | 670     | 673    | 676    | 672    | 668    | 661    | 672    | 673    | 674    | 670    | 646    | 644    |
| 84        | 678    | 673     | 676    | 679    | 675    | 671    | 664    | 675    | 676    | 678    | 673    | 650    | 648    |
| 85        | 681    | 677     | 680    | 683    | 679    | 674    | 668    | 678    | 680    | 682    | 677    | 654    | 652    |
| 86        | 685    | 682     |        | 687    |        | 678    | 672    | 682    | 684    | 685    | 681    | 658    | 656    |
| 87        | 688    | 685     |        | 691    |        | 682    | 675    | 686    | 687    | 689    | 685    | 663    | 661    |
| 88        | 691    | 690     |        |        |        | 686    |        | 690    | 691    | 693    | 689    | 668    | 666    |
| 89        | 694    | 693     |        |        |        |        |        | 693    | 695    | 696    | 693    | 673    | 671    |
| 90        | 698    | 697     |        |        |        |        |        | 697    | 699    | 700    | 697    | 678    | 676    |
| 91        | 701    | 702     |        |        |        |        |        |        | 703    | 704    | 701    | 684    | 682    |
| 92        | 705    | 706     |        |        |        |        |        |        | 707    | 708    | 705    | 690    | 688    |
| 93        | 709    | 710     |        |        |        |        |        |        | 711    |        | 709    | 695    | 694    |
| 94        | 713    | 715     |        |        |        |        |        |        |        |        | 714    |        | 700    |
| 95        | 717    | 721     |        |        |        |        |        |        |        |        | 719    |        | 706    |
| 96        |        | 731     |        |        |        |        |        |        |        |        | 738    |        | 713    |
| 97        |        | 732     |        |        |        |        |        |        |        |        | 762    |        |        |
| 98        |        | 752     |        |        |        |        |        |        |        |        |        |        |        |
| 99        |        | 790     |        |        |        |        |        |        |        |        |        |        |        |
| FBP 99,5  |        | 818     |        |        |        |        |        |        |        |        |        |        |        |
| %Recovery | 95.995 | 101.290 | 85.196 | 87.039 | 85.477 | 88.620 | 87.480 | 90.729 | 93.375 | 92.523 | 97.433 | 93.061 | 96.616 |

|                        |      |       |      |      |      |      |       |      |      |       |       |      |      |
|------------------------|------|-------|------|------|------|------|-------|------|------|-------|-------|------|------|
| Boiling below<br>360°C | 3.76 | 13.00 | 9.11 | 8.44 | 7.11 | 9.71 | 12.13 | 9.00 | 9.82 | 10.00 | 13.27 | 9.71 | 5.43 |
|------------------------|------|-------|------|------|------|------|-------|------|------|-------|-------|------|------|



|                         |       |       |       |       |       |       |       |       |       |       |       |       |       |
|-------------------------|-------|-------|-------|-------|-------|-------|-------|-------|-------|-------|-------|-------|-------|
| Boiling below 540°C     | 41.67 | 38.75 | 36.67 | 36.67 | 40.75 | 44.50 | 38.67 | 36.50 | 34.67 | 39.33 | 38.67 | 57.50 | 57.50 |
| Boiling above 540°C     | 58.33 | 61.25 | 63.33 | 63.33 | 59.25 | 55.50 | 61.33 | 63.50 | 65.33 | 60.67 | 61.33 | 42.50 | 42.50 |
| T50% - 540 + Percentage | 70.83 | 69.38 | 68.33 | 68.33 | 70.38 | 72.25 | 69.33 | 68.25 | 67.33 | 69.67 | 69.33 | 78.75 | 78.75 |
| T50% - 540 + Degree     | 646.7 | 627.1 | 631.0 | 633.0 | 637.1 | 636.8 | 620.0 | 630.8 | 628.0 | 637.0 | 629.0 | 628.0 | 626.0 |
|                         |       |       |       |       |       |       |       |       |       |       |       |       |       |

**Continuation of  
Table S5**

| HTSD of H-Oil feed | 28.04.2023 | 09.05.2023 | 15.05.2023 | 22.05.2023 | 29.05.2023 | 05.06.2023 | 12.06.2023 | 19.06.2023 | 26.06.2023 | 03.07.2023 | 10.07.2023 | 17.07.2023 | 24.07.2023 |
|--------------------|------------|------------|------------|------------|------------|------------|------------|------------|------------|------------|------------|------------|------------|
| wt. %              | °C         |
| IBP 0.5            | 240        | 179        | 214        | 237        | 227        | 185        | 234        | 234        | 243        | 255        | 271        | 270        | 265        |
| 1                  | 271        | 195        | 229        | 253        | 242        | 201        | 246        | 247        | 258        | 277        | 284        | 285        | 287        |
| 2                  | 312        | 211        | 247        | 272        | 260        | 219        | 260        | 264        | 274        | 310        | 307        | 311        | 328        |
| 3                  | 332        | 225        | 261        | 284        | 272        | 235        | 272        | 276        | 285        | 341        | 330        | 335        | 363        |
| 4                  | 345        | 238        | 273        | 296        | 283        | 247        | 283        | 287        | 298        | 363        | 351        | 357        | 397        |
| 5                  | 355        | 247        | 283        | 309        | 294        | 257        | 296        | 300        | 311        | 386        | 372        | 379        | 421        |
| 6                  | 363        | 258        | 294        | 319        | 305        | 267        | 309        | 313        | 322        | 405        | 399        | 402        | 438        |
| 7                  | 370        | 268        | 305        | 329        | 316        | 276        | 321        | 324        | 332        | 422        | 423        | 424        | 448        |
| 8                  | 376        | 276        | 316        | 338        | 324        | 285        | 332        | 335        | 342        | 436        | 440        | 439        | 466        |
| 9                  | 382        | 284        | 325        | 347        | 335        | 295        | 342        | 344        | 349        | 445        | 453        | 449        | 475        |
| 10                 | 386        | 292        | 335        | 357        | 343        | 306        | 352        | 354        | 357        | 460        | 469        | 467        | 482        |
| 11                 | 391        | 301        | 343        | 366        | 352        | 316        | 363        | 364        | 365        | 472        | 478        | 475        | 492        |
| 12                 | 396        | 310        | 352        | 376        | 361        | 326        | 374        | 374        | 374        | 479        | 487        | 482        | 499        |

|    |     |     |     |     |     |     |     |     |     |     |     |     |     |
|----|-----|-----|-----|-----|-----|-----|-----|-----|-----|-----|-----|-----|-----|
| 13 | 400 | 318 | 361 | 386 | 370 | 337 | 384 | 384 | 386 | 489 | 496 | 492 | 504 |
| 14 | 404 | 325 | 370 | 397 | 380 | 346 | 396 | 395 | 396 | 498 | 501 | 499 | 508 |
| 15 | 408 | 333 | 379 | 408 | 390 | 356 | 408 | 406 | 405 | 503 | 506 | 503 | 513 |
| 16 | 412 | 339 | 389 | 419 | 401 | 367 | 419 | 417 | 415 | 509 | 511 | 508 | 518 |
| 17 | 415 | 345 | 400 | 430 | 412 | 379 | 430 | 427 | 426 | 515 | 517 | 513 | 523 |
| 18 | 418 | 352 | 410 | 439 | 422 | 390 | 439 | 436 | 435 | 521 | 522 | 518 | 527 |
| 19 | 421 | 358 | 421 | 449 | 432 | 403 | 448 | 445 | 442 | 525 | 526 | 523 | 530 |
| 20 | 424 | 364 | 432 | 463 | 442 | 415 | 461 | 456 | 448 | 530 | 530 | 527 | 534 |
| 21 | 428 | 371 | 442 | 473 | 451 | 427 | 471 | 467 | 462 | 533 | 533 | 530 | 537 |
| 22 | 430 | 377 | 453 | 482 | 465 | 437 | 479 | 475 | 471 | 537 | 537 | 533 | 540 |
| 23 | 434 | 383 | 467 | 491 | 474 | 447 | 488 | 483 | 478 | 541 | 540 | 537 | 544 |
| 24 | 437 | 390 | 478 | 499 | 483 | 460 | 496 | 491 | 486 | 545 | 544 | 540 | 547 |
| 25 | 440 | 397 | 488 | 505 | 492 | 471 | 502 | 498 | 496 | 549 | 547 | 544 | 550 |
| 26 | 444 | 404 | 498 | 512 | 500 | 480 | 508 | 504 | 501 | 552 | 550 | 547 | 553 |
| 27 | 447 | 411 | 505 | 517 | 506 | 489 | 514 | 509 | 507 | 555 | 553 | 550 | 556 |
| 28 | 450 | 418 | 513 | 523 | 513 | 497 | 519 | 515 | 513 | 558 | 556 | 553 | 559 |
| 29 | 454 | 425 | 519 | 528 | 518 | 504 | 524 | 520 | 519 | 561 | 559 | 556 | 561 |
| 30 | 457 | 432 | 525 | 532 | 524 | 511 | 529 | 525 | 524 | 564 | 562 | 559 | 564 |
| 31 | 460 | 438 | 530 | 536 | 529 | 517 | 533 | 529 | 528 | 567 | 565 | 561 | 567 |
| 32 | 464 | 444 | 535 | 540 | 533 | 522 | 537 | 533 | 532 | 570 | 567 | 564 | 569 |
| 33 | 467 | 452 | 540 | 544 | 537 | 527 | 540 | 537 | 537 | 572 | 570 | 567 | 571 |
| 34 | 471 | 461 | 544 | 548 | 541 | 532 | 544 | 540 | 541 | 575 | 572 | 569 | 574 |
| 35 | 475 | 469 | 548 | 551 | 545 | 536 | 547 | 544 | 544 | 577 | 575 | 572 | 576 |
| 36 | 478 | 476 | 552 | 555 | 548 | 540 | 551 | 547 | 548 | 580 | 577 | 574 | 579 |
| 37 | 482 | 483 | 556 | 558 | 552 | 544 | 554 | 551 | 552 | 583 | 580 | 576 | 581 |
| 38 | 485 | 491 | 559 | 561 | 556 | 548 | 557 | 554 | 556 | 585 | 582 | 579 | 583 |
| 39 | 489 | 498 | 562 | 564 | 559 | 551 | 560 | 557 | 559 | 588 | 585 | 581 | 586 |
| 40 | 492 | 504 | 566 | 567 | 562 | 555 | 563 | 560 | 562 | 590 | 587 | 584 | 588 |
| 41 | 496 | 509 | 569 | 570 | 565 | 558 | 566 | 563 | 565 | 593 | 590 | 586 | 591 |

|    |     |     |     |     |     |     |     |     |     |     |     |     |     |
|----|-----|-----|-----|-----|-----|-----|-----|-----|-----|-----|-----|-----|-----|
| 42 | 499 | 515 | 571 | 573 | 568 | 561 | 569 | 566 | 568 | 595 | 592 | 589 | 593 |
| 43 | 503 | 521 | 574 | 575 | 571 | 564 | 571 | 569 | 571 | 598 | 595 | 591 | 595 |
| 44 | 506 | 526 | 577 | 578 | 573 | 567 | 574 | 572 | 574 | 600 | 597 | 594 | 598 |
| 45 | 510 | 530 | 580 | 581 | 576 | 570 | 577 | 575 | 577 | 602 | 600 | 596 | 600 |
| 46 | 514 | 535 | 583 | 584 | 579 | 573 | 579 | 577 | 580 | 605 | 602 | 598 | 602 |
| 47 | 517 | 539 | 586 | 587 | 582 | 576 | 582 | 580 | 583 | 607 | 604 | 601 | 605 |
| 48 | 521 | 543 | 589 | 589 | 585 | 578 | 585 | 583 | 585 | 610 | 607 | 603 | 607 |
| 49 | 525 | 547 | 592 | 592 | 587 | 581 | 587 | 586 | 588 | 612 | 609 | 606 | 609 |
| 50 | 529 | 552 | 594 | 595 | 590 | 584 | 590 | 589 | 591 | 615 | 612 | 608 | 612 |
| 51 | 533 | 556 | 597 | 597 | 593 | 587 | 593 | 591 | 594 | 617 | 614 | 611 | 614 |
| 52 | 536 | 559 | 600 | 600 | 596 | 590 | 595 | 594 | 597 | 620 | 617 | 613 | 617 |
| 53 | 540 | 563 | 602 | 603 | 598 | 593 | 598 | 597 | 599 | 622 | 619 | 615 | 619 |
| 54 | 544 | 567 | 605 | 605 | 601 | 595 | 601 | 600 | 602 | 624 | 622 | 618 | 621 |
| 55 | 548 | 570 | 608 | 608 | 604 | 598 | 604 | 602 | 605 | 627 | 624 | 620 | 624 |
| 56 | 552 | 573 | 611 | 611 | 607 | 601 | 606 | 605 | 608 | 629 | 627 | 623 | 626 |
| 57 | 556 | 577 | 613 | 613 | 609 | 604 | 609 | 608 | 611 | 631 | 629 | 625 | 629 |
| 58 | 559 | 580 | 616 | 616 | 612 | 607 | 612 | 611 | 614 | 634 | 631 | 628 | 631 |
| 59 | 563 | 584 | 619 | 619 | 615 | 609 | 614 | 614 | 617 | 636 | 633 | 630 | 633 |
| 60 | 567 | 588 | 622 | 622 | 618 | 612 | 617 | 617 | 620 | 638 | 636 | 632 | 635 |
| 61 | 571 | 591 | 624 | 624 | 620 | 615 | 620 | 619 | 623 | 641 | 638 | 635 | 637 |
| 62 | 574 | 595 | 627 | 627 | 623 | 618 | 623 | 622 | 626 | 643 | 640 | 637 | 640 |
| 63 | 578 | 598 | 630 | 629 | 626 | 621 | 626 | 625 | 629 | 645 | 643 | 639 | 642 |
| 64 | 582 | 601 | 632 | 632 | 629 | 624 | 628 | 628 | 631 | 648 | 645 | 642 | 644 |
| 65 | 586 | 605 | 635 | 634 | 631 | 627 | 631 | 631 | 634 | 650 | 647 | 644 | 647 |
| 66 | 590 | 609 | 637 | 637 | 634 | 629 | 634 | 633 | 637 | 652 | 650 | 647 | 649 |
| 67 | 594 | 612 | 640 | 640 | 637 | 632 | 636 | 636 | 640 | 654 | 652 | 649 | 651 |
| 68 | 597 | 616 | 643 | 642 | 639 | 635 | 639 | 639 | 643 | 656 | 654 | 651 | 653 |
| 69 | 601 | 619 | 645 | 645 | 642 | 638 | 642 | 641 | 645 | 658 | 656 | 653 | 655 |
| 70 | 605 | 623 | 648 | 647 | 645 | 640 | 644 | 644 | 648 | 661 | 658 | 655 | 657 |

[illegible]

|           |        |        |        |        |        |        |        |        |        |        |        |        |        |
|-----------|--------|--------|--------|--------|--------|--------|--------|--------|--------|--------|--------|--------|--------|
| FBP 99,5  |        |        |        |        |        |        |        |        |        |        |        |        |        |
| %Recovery | 92.059 | 91.229 | 90.009 | 91.846 | 90.756 | 89.337 | 91.290 | 92.008 | 89.501 | 87.843 | 87.676 | 85.764 | 88.060 |

|                         |       |       |       |       |       |       |       |       |       |       |       |       |       |
|-------------------------|-------|-------|-------|-------|-------|-------|-------|-------|-------|-------|-------|-------|-------|
| Boiling below 360°C     | 5.63  | 19.33 | 12.89 | 10.33 | 11.89 | 15.36 | 10.73 | 10.60 | 10.38 | 3.86  | 4.43  | 4.14  | 2.91  |
| Boiling below 540°C     | 53.25 | 47.25 | 33.00 | 32.00 | 33.75 | 36.00 | 33.00 | 34.00 | 33.75 | 22.75 | 23.00 | 24.00 | 22.00 |
| Boiling above 540°C     | 46.75 | 52.75 | 67.00 | 68.00 | 66.25 | 64.00 | 67.00 | 66.00 | 66.25 | 77.25 | 77.00 | 76.00 | 76.00 |
| T50% - 540 + Percentage | 76.63 | 73.63 | 66.50 | 66.00 | 66.88 | 68.00 | 66.50 | 67.00 | 66.88 | 61.38 | 61.50 | 62.00 | 61.00 |
| T50% - 540 + Degree     | 631.9 | 634.9 | 638.5 | 637.0 | 636.6 | 635.0 | 635.0 | 636.0 | 639.6 | 641.8 | 639.0 | 637.0 | 637.0 |

The meaning of designations is following:

Boiling below 360°C = Content of material boiling below 360°C, wt.%

Boiling below 540°C = Content of material boiling below 540°C, wt.%

Boiling above 540°C = Content of material boiling above 540°C, wt.%

T50% - 540 + Percentage = Percentage of T50% of fraction boiling above 540°C in H-Oil feed distillation curve, wt.%

T50% - 540 + Degree = T50% of fraction boiling above 540°C, °C

**Table S6.** Properties of H-Oil VTB

|    | Date       | VTB D15 | VTB T50 | VTB<br>MW | VTB C5<br>asp | VTB C7<br>asp | VTB<br>Res | VTB<br>ARO | VTB Sat. | VTB Kw | VTB Sulphur | VTB<br>CII (C5) | VTB<br>CII (C7) |
|----|------------|---------|---------|-----------|---------------|---------------|------------|------------|----------|--------|-------------|-----------------|-----------------|
| No |            | g/cm3   | °C      | g/mol     | wt.%          | wt.%          | wt.%       | wt.%       | wt.%     |        | wt.%        |                 |                 |
| 1  | 11.04.2022 | 1.0182  | 604     | 672       | 26.2          | 18.6          | 7.7        | 52.8       | 21.0     | 11.44  | 1.30        | 0.89            | 0.65            |
| 2  | 23.05.2022 | 1.0193  | 601     | 663       | 18.3          | 16.0          | 2.3        | 61.0       | 20.7     | 11.41  | 1.03        | 0.64            | 0.58            |
| 3  | 30.05.2022 | 1.0137  | 606     | 680       | 20.6          | 15.6          | 5.1        | 57.1       | 22.2     | 11.50  | 0.91        | 0.75            | 0.61            |
| 4  | 06.06.2022 | 1.0003  | 598     | 666       | 20.5          | 14.8          | 5.7        | 53.2       | 26.4     | 11.61  | 0.93        | 0.88            | 0.70            |
| 5  | 13.06.2022 | 1.0012  | 603     | 679       | 18.6          | 15.4          | 3.2        | 55.4       | 26.1     | 11.63  | 0.92        | 0.81            | 0.71            |
| 6  | 20.06.2022 | 1.0078  | 598     | 661       | 19.4          | 14.5          | 4.8        | 56.7       | 24.0     | 11.53  | 0.95        | 0.76            | 0.63            |
| 7  | 27.06.2022 | 1.0159  | 601     | 665       | 19.9          | 16.1          | 3.8        | 58.5       | 21.6     | 11.45  | 1.04        | 0.71            | 0.60            |
| 8  | 04.07.2022 | 1.0255  | 603     | 665       | 19.1          | 13.3          | 5.8        | 61.8       | 19.1     | 11.35  | 1.07        | 0.62            | 0.48            |
| 9  | 11.07.2022 | 1.0290  | 602     | 660       | 20.8          | 16.7          | 4.1        | 61.0       | 18.2     | 11.31  | 1.05        | 0.64            | 0.54            |
| 10 | 05.09.2022 | 1.0469  | 598     | 640       | 32.2          | 27.6          | 4.6        | 53.3       | 14.5     | 11.10  | 1.23        | 0.88            | 0.73            |
| 11 | 03.10.2022 | 1.0213  | 600     | 659       | 25.7          | 17.96         | 7.7        | 54.1       | 20.2     | 11.38  | 1.12        | 0.85            | 0.62            |
| 12 | 28.11.2022 | 1.0580  | 597     | 631       | 31.9          | 22.7          | 9.2        | 55.6       | 12.5     | 10.98  | 1.09        | 0.80            | 0.54            |
| 13 | 03.01.2023 | 1.0443  | 598     | 641       | 27.9          | 20.1          | 7.8        | 57.2       | 15.0     | 11.12  | 1.20        | 0.75            | 0.54            |
| 14 | 30.01.2023 | 1.041   | 595     | 635       | 30.0          | 21.2          | 8.8        | 54.3       | 15.6     | 11.15  | 1.09        | 0.84            | 0.58            |
| 15 | 06.02.2023 | 1.0342  | 594     | 636       | 25.8          | 18.4          | 7.3        | 57.2       | 17.1     | 11.22  | 0.82        | 0.75            | 0.55            |
| 16 | 13.02.2023 | 1.0395  | 600     | 649       | 25.9          | 17.3          | 8.7        | 58.1       | 15.9     | 11.18  | 0.79        | 0.72            | 0.50            |
| 17 | 20.02.2023 | 1.041   | 592     | 627       | 25.8          | 18.7          | 7.1        | 58.6       | 15.6     | 11.13  | 0.84        | 0.71            | 0.52            |
| 18 | 27.02.2023 | 1.034   | 588     | 620       | 22.2          | 17.9          | 4.3        | 60.8       | 17.0     | 11.19  | 0.78        | 0.64            | 0.54            |
| 19 | 06.03.2023 | 1.0390  | 591     | 626       | 24.8          | 18.6          | 6.2        | 59.2       | 16.0     | 11.15  | 0.78        | 0.69            | 0.53            |
| 20 | 13.03.2023 | 1.0411  | 591     | 625       | 27.4          | 22.6          | 4.8        | 57.1       | 15.6     | 11.13  | 0.67        | 0.75            | 0.62            |
| 21 | 20.03.2023 | 1.0364  | 583     | 607       | 26.8          | 18.9          | 7.9        | 56.6       | 16.6     | 11.14  | 0.89        | 0.77            | 0.55            |
| 22 | 27.03.2023 | 1.0572  | 585     | 602       | 28.6          | 24.2          | 4.4        | 58.8       | 12.6     | 10.93  | 0.87        | 0.70            | 0.58            |
| 23 | 03.04.2023 | 1.082   | 584     | 588       | 32.0          | 27.5          | 4.6        | 58.9       | 9.1      | 10.68  | 0.83        | 0.70            | 0.58            |
| 24 | 10.04.2023 | 1.0781  | 585     | 592       | 31.6          | 26.3          | 5.3        | 58.8       | 9.6      | 10.72  | 0.78        | 0.70            | 0.56            |
| 25 | 18.04.2023 | 1.0588  | 596     | 628       | 30.6          | 21.7          | 8.9        | 57.1       | 12.4     | 10.96  | 0.90        | 0.75            | 0.52            |

|    |            |        |     |     |      |      |     |      |      |       |      |      |      |
|----|------------|--------|-----|-----|------|------|-----|------|------|-------|------|------|------|
| 26 | 24.04.2023 | 1.0468 | 600 | 645 | 32.0 | 25.2 | 6.8 | 53.5 | 14.5 | 11.11 | 0.82 | 0.87 | 0.66 |
| 27 | 28.04.2023 | 1.0541 | 595 | 628 | 31.9 | 23.5 | 8.5 | 54.9 | 13.2 | 11.01 | 1.13 | 0.82 | 0.58 |
| 28 | 09.05.2023 | 1.0721 | 590 | 607 | 36.3 | 29.4 | 6.9 | 53.3 | 10.4 | 10.80 | 1.14 | 0.87 | 0.66 |
| 29 | 15.05.2023 | 1.0733 | 586 | 596 | 35.8 | 31.9 | 3.9 | 54.0 | 10.2 | 10.77 | 1.19 | 0.85 | 0.73 |
| 30 | 22.05.2023 | 1.0858 | 588 | 595 | 37.6 | 28.0 | 9.5 | 53.8 | 8.6  | 10.66 | 1.19 | 0.86 | 0.58 |
| 31 | 29.05.2023 | 1.0746 | 582 | 586 | 34.1 | 28.3 | 5.8 | 55.8 | 10.0 | 10.74 | 1.17 | 0.79 | 0.62 |
| 32 | 05.06.2023 | 1.0734 | 582 | 587 | 36.5 | 28.2 | 8.3 | 53.3 | 10.2 | 10.76 | 1.16 | 0.88 | 0.62 |
| 33 | 12.06.2023 | 1.0833 | 580 | 578 | 39.0 | 33.6 | 5.5 | 52.0 | 8.9  | 10.65 | 1.15 | 0.92 | 0.74 |
| 34 | 19.06.2023 | 1.0759 | 570 | 558 | 32.1 | 25.6 | 6.5 | 58.1 | 9.9  | 10.68 | 1.02 | 0.72 | 0.55 |
| 35 | 26.06.2023 | 1.0652 | 568 | 558 | 29.7 | 24.0 | 5.7 | 59.0 | 11.4 | 10.78 | 0.87 | 0.70 | 0.55 |
| 36 | 03.07.2023 | 1.0039 | 591 | 645 | 24.0 | 16.9 | 7.1 | 50.8 | 25.2 | 11.54 | 1.4  | 0.97 | 0.73 |
| 37 | 10.07.2023 | 1.0009 | 609 | 696 | 21.9 | 13.7 | 8.2 | 52.0 | 26.2 | 11.66 | 1.3  | 0.92 | 0.66 |
| 38 | 17.07.2023 | 1.0016 | 606 | 687 | 19.0 | 13.0 | 6.0 | 55.1 | 25.9 | 11.63 | 1.2  | 0.82 | 0.64 |
| 39 | 24.07.2023 | 0.9936 | 601 | 678 | 17.5 | 11.5 | 6.0 | 53.8 | 28.7 | 11.71 | 1.1  | 0.86 | 0.67 |
|    | min        | 0.9936 | 568 | 558 | 17.5 | 11.5 | 2.3 | 50.8 | 8.6  | 10.7  | 0.7  | 0.35 | 0.38 |
|    | max        | 1.0858 | 609 | 696 | 39.0 | 33.6 | 9.5 | 61.8 | 28.7 | 11.7  | 1.4  | 2.10 | 0.87 |

Note: The meaning of designations used in Table S6 is following:

VTB D15 = density of H-Oil VTB feed, g/cm<sup>3</sup>;

VTB T50 = boiling point of 50% of evaporate according to the HTSD (ASTM D7169 of H-Oil VTB, °C);

VTB MW = Molecular weight of H-Oil VTB, g/mol;

VTB C5 asp. = Content of C<sub>5</sub> asphaltenes in H-Oil VTB, wt.%;

VTB C7 asp. = Content of C<sub>7</sub> asphaltenes in H-Oil VTB, wt.%;

VTB Res = Content of resins in H-Oil VTB, wt.%;

VTB ARO = Content of aromatic compounds in H-Oil VTB, wt.%;

VTB Sat = Content of saturated compounds in H-Oil VTB, wt.%;

VTB Kw = Kw-characterization factor of H-Oil VTB;

VTB Sulphur = Content of sulphur in H-Oil VTB;

VTB CII (C5) = Colloidal instability index of H-Oil VTB determined on the base of C<sub>5</sub> asphaltene content;

VTB CII (C7) = Colloidal instability index of H-Oil VTB determined on the base of C<sub>7</sub> asphaltene content.



**Table S7.** High temperature simulated distillation data of H-Oil VTB

| HTSD of H-Oil VTB | 11.04.2022 | 23.05.2022 | 30.05.2022 | 06.06.2022 | 13.06.2022 | 20.06.2022 | 27.06.2022 | 04.07.2022 | 11.07.2022 | 05.09.2022 | 03.10.2022 | 28.11.2022 | 03.01.2023 |
|-------------------|------------|------------|------------|------------|------------|------------|------------|------------|------------|------------|------------|------------|------------|
| wt. %             | °C         |
| IBP 0.5           | 457        | 369        | 435        | 417        | 409        | 414        | 430        | 473        | 471        | 407        | 349        | 246        | 423        |
| 1                 | 467        | 393        | 443        | 427        | 420        | 424        | 440        | 480        | 477        | 427        | 377        | 311        | 437        |
| 2                 | 477        | 415        | 460        | 440        | 435        | 438        | 459        | 491        | 489        | 451        | 413        | 416        | 455        |
| 3                 | 485        | 431        | 473        | 451        | 446        | 447        | 474        | 499        | 497        | 465        | 441        | 452        | 467        |
| 4                 | 494        | 442        | 482        | 467        | 460        | 461        | 485        | 504        | 503        | 477        | 461        | 470        | 478        |
| 5                 | 500        | 453        | 493        | 476        | 472        | 472        | 496        | 508        | 507        | 486        | 476        | 482        | 486        |
| 6                 | 504        | 468        | 501        | 484        | 480        | 480        | 502        | 513        | 512        | 494        | 487        | 491        | 493        |
| 7                 | 509        | 477        | 506        | 493        | 489        | 488        | 507        | 517        | 516        | 500        | 495        | 499        | 499        |
| 8                 | 513        | 486        | 512        | 500        | 497        | 496        | 512        | 521        | 520        | 505        | 502        | 504        | 505        |
| 9                 | 517        | 496        | 517        | 505        | 502        | 502        | 516        | 524        | 523        | 510        | 508        | 510        | 509        |
| 10                | 521        | 502        | 521        | 509        | 507        | 506        | 521        | 527        | 527        | 514        | 513        | 514        | 514        |
| 11                | 525        | 508        | 525        | 514        | 512        | 511        | 524        | 530        | 530        | 518        | 517        | 518        | 518        |
| 12                | 528        | 514        | 529        | 518        | 516        | 516        | 527        | 533        | 532        | 522        | 522        | 522        | 521        |
| 13                | 531        | 519        | 532        | 522        | 520        | 520        | 531        | 536        | 535        | 525        | 525        | 525        | 525        |
| 14                | 534        | 523        | 535        | 525        | 524        | 524        | 533        | 538        | 537        | 528        | 529        | 529        | 528        |
| 15                | 536        | 527        | 538        | 528        | 527        | 527        | 536        | 540        | 540        | 531        | 532        | 532        | 531        |
| 16                | 539        | 531        | 541        | 531        | 531        | 530        | 539        | 543        | 542        | 534        | 535        | 535        | 534        |
| 17                | 541        | 534        | 544        | 534        | 534        | 533        | 541        | 545        | 544        | 537        | 538        | 537        | 537        |
| 18                | 544        | 537        | 546        | 537        | 536        | 536        | 543        | 547        | 547        | 539        | 541        | 540        | 540        |
| 19                | 546        | 540        | 549        | 539        | 539        | 538        | 546        | 549        | 549        | 542        | 543        | 542        | 542        |
| 20                | 548        | 542        | 551        | 542        | 542        | 541        | 548        | 551        | 551        | 544        | 546        | 544        | 545        |
| 21                | 550        | 545        | 553        | 544        | 544        | 543        | 550        | 554        | 553        | 546        | 548        | 547        | 547        |
| 22                | 553        | 548        | 556        | 546        | 547        | 546        | 552        | 556        | 555        | 549        | 550        | 549        | 549        |
| 23                | 555        | 550        | 558        | 549        | 549        | 548        | 555        | 557        | 557        | 551        | 553        | 551        | 551        |
| 24                | 557        | 553        | 560        | 551        | 551        | 550        | 557        | 559        | 559        | 553        | 555        | 553        | 554        |

|    |     |     |     |     |     |     |     |     |     |     |     |     |     |
|----|-----|-----|-----|-----|-----|-----|-----|-----|-----|-----|-----|-----|-----|
| 25 | 559 | 555 | 562 | 553 | 554 | 553 | 559 | 561 | 561 | 555 | 557 | 555 | 556 |
| 26 | 561 | 557 | 564 | 555 | 556 | 555 | 560 | 563 | 562 | 557 | 559 | 557 | 558 |
| 27 | 563 | 559 | 566 | 557 | 558 | 557 | 562 | 565 | 564 | 559 | 561 | 559 | 560 |
| 28 | 565 | 561 | 567 | 559 | 560 | 559 | 564 | 566 | 566 | 561 | 563 | 561 | 562 |
| 29 | 566 | 563 | 569 | 561 | 562 | 561 | 566 | 568 | 568 | 563 | 565 | 563 | 564 |
| 30 | 568 | 565 | 571 | 563 | 564 | 563 | 568 | 570 | 569 | 565 | 566 | 565 | 565 |
| 31 | 570 | 567 | 573 | 565 | 566 | 565 | 569 | 571 | 571 | 566 | 568 | 566 | 567 |
| 32 | 572 | 569 | 574 | 567 | 568 | 567 | 571 | 573 | 572 | 568 | 570 | 568 | 569 |
| 33 | 573 | 571 | 576 | 568 | 569 | 568 | 573 | 574 | 574 | 570 | 571 | 570 | 570 |
| 34 | 575 | 573 | 578 | 570 | 571 | 570 | 574 | 576 | 576 | 571 | 573 | 571 | 572 |
| 35 | 577 | 574 | 580 | 572 | 573 | 572 | 576 | 578 | 577 | 573 | 575 | 573 | 574 |
| 36 | 579 | 576 | 581 | 573 | 575 | 573 | 578 | 579 | 579 | 575 | 576 | 574 | 575 |
| 37 | 580 | 578 | 583 | 575 | 576 | 575 | 579 | 581 | 581 | 576 | 578 | 576 | 577 |
| 38 | 582 | 580 | 585 | 577 | 578 | 577 | 581 | 583 | 582 | 578 | 580 | 578 | 579 |
| 39 | 584 | 581 | 587 | 579 | 580 | 579 | 583 | 584 | 584 | 580 | 581 | 579 | 580 |
| 40 | 586 | 583 | 588 | 580 | 582 | 580 | 584 | 586 | 586 | 581 | 583 | 581 | 582 |
| 41 | 587 | 585 | 590 | 582 | 584 | 582 | 586 | 588 | 587 | 583 | 585 | 583 | 584 |
| 42 | 589 | 587 | 592 | 584 | 585 | 584 | 588 | 589 | 589 | 585 | 586 | 584 | 585 |
| 43 | 591 | 588 | 593 | 586 | 587 | 586 | 589 | 591 | 590 | 587 | 588 | 586 | 587 |
| 44 | 593 | 590 | 595 | 587 | 589 | 587 | 591 | 593 | 592 | 588 | 590 | 588 | 589 |
| 45 | 594 | 592 | 597 | 589 | 591 | 589 | 593 | 594 | 594 | 590 | 591 | 589 | 590 |
| 46 | 596 | 594 | 599 | 591 | 592 | 591 | 594 | 596 | 595 | 592 | 593 | 591 | 592 |
| 47 | 598 | 595 | 600 | 593 | 594 | 593 | 596 | 597 | 597 | 593 | 595 | 593 | 593 |
| 48 | 600 | 597 | 602 | 595 | 596 | 594 | 598 | 599 | 599 | 595 | 596 | 594 | 595 |
| 49 | 602 | 599 | 604 | 596 | 598 | 596 | 599 | 601 | 600 | 597 | 598 | 596 | 597 |
| 50 | 604 | 601 | 606 | 598 | 600 | 598 | 601 | 603 | 602 | 598 | 600 | 597 | 598 |
| 51 | 606 | 603 | 608 | 600 | 601 | 600 | 603 | 605 | 604 | 600 | 601 | 599 | 600 |
| 52 | 608 | 605 | 610 | 602 | 603 | 601 | 605 | 606 | 606 | 602 | 603 | 601 | 602 |
| 53 | 610 | 607 | 611 | 604 | 605 | 603 | 607 | 608 | 608 | 604 | 605 | 602 | 603 |

|    |            |            |            |            |            |            |            |            |            |            |            |            |            |
|----|------------|------------|------------|------------|------------|------------|------------|------------|------------|------------|------------|------------|------------|
| 54 | 612        | 609        | 613        | 606        | 607        | 605        | 609        | 610        | 610        | 606        | 607        | 604        | 605        |
| 55 | 614        | 610        | 615        | 608        | 609        | 607        | 610        | 612        | 611        | 607        | 608        | 606        | 607        |
| 56 | 616        | 612        | 617        | 610        | 611        | 609        | 612        | 614        | 613        | 609        | 610        | 608        | 609        |
| 57 | 618        | 614        | 619        | 612        | 613        | 611        | 614        | 616        | 615        | 611        | 612        | 610        | 611        |
| 58 | 620        | 616        | 621        | 614        | 615        | 613        | 616        | 617        | 617        | 613        | 614        | 611        | 612        |
| 59 | 622        | 618        | 623        | 616        | 617        | 615        | 618        | 619        | 619        | 615        | 616        | 613        | 614        |
| 60 | 624        | 620        | 625        | 618        | 619        | 617        | 620        | 622        | 621        | 617        | 618        | 615        | 616        |
| 61 | 626        | 623        | 627        | 620        | 621        | 619        | 622        | 624        | 623        | 619        | 620        | 617        | 618        |
| 62 | 629        | 625        | 629        | 622        | 624        | 621        | 624        | 626        | 625        | 621        | 622        | 619        | 620        |
| 63 | 631        | 627        | 631        | 624        | 626        | 624        | 626        | 628        | 627        | 623        | 624        | 621        | 622        |
| 64 | 633        | 629        | 633        | 626        | 628        | 626        | 629        | 630        | 629        | 625        | 626        | 623        | 624        |
| 65 | 635        | 631        | 636        | 629        | 630        | 628        | 631        | 632        | 631        | 627        | 628        | 625        | 626        |
| 66 | 637        | 633        | 638        | 631        | 632        | 630        | 633        | 634        | 633        | 629        | 630        | 627        | 628        |
| 67 | 640        | 635        | 640        | 633        | 635        | 632        | 635        | 636        | 636        | 631        | 631        | 629        | 630        |
| 68 | 642        | 638        | 643        | 635        | 637        | 635        | 637        | 638        | 638        | 633        | 634        | 631        | 632        |
| 69 | 645        | 640        | 645        | 638        | 639        | 637        | 639        | 641        | 640        | 635        | 636        | 633        | 634        |
| 70 | <b>647</b> | <b>643</b> | <b>647</b> | <b>640</b> | <b>642</b> | <b>639</b> | <b>642</b> | <b>643</b> | <b>643</b> | <b>638</b> | <b>638</b> | <b>635</b> | <b>636</b> |
| 71 | 650        | 645        | 650        | 643        | 644        | 642        | 644        | 645        | 645        | 640        | 640        | 638        | 639        |
| 72 | 652        | 648        | 652        | 645        | 647        | 644        | 647        | 648        | 648        | 642        | 642        | 640        | 641        |
| 73 | 655        | 650        | 655        | 648        | 650        | 647        | 649        | 650        | 650        | 645        | 645        | 642        | 643        |
| 74 | 657        | 653        | 657        | 651        | 652        | 650        | 652        | 653        | 653        | 647        | 647        | 645        | 645        |
| 75 | 660        | 655        | 660        | 653        | 655        | 652        | 654        | 655        | 655        | 649        | 649        | 647        | 648        |
| 76 | 663        | 657        | 663        | 656        | 657        | 622        | 657        | 658        | 657        | 652        | 652        | 649        | 650        |
| 77 | 667        | 660        | 666        | 658        | 660        | 657        | 660        | 661        | 660        | 654        | 654        | 652        | 653        |
| 78 | 670        | 664        | 669        | 662        | 663        | 661        | 663        | 664        | 664        | 656        | 656        | 654        | 655        |
| 79 | 673        | 667        | 672        | 665        | 667        | 664        | 666        | 667        | 667        | 659        | 659        | 657        | 657        |
| 80 | 676        | 670        | 675        | 668        | 670        | 668        | 670        | 670        | 670        | 662        | 662        | 659        | 660        |
| 81 | 680        | 673        | 678        | 672        | 673        | 671        | 673        | 673        | 673        | 665        | 665        | 663        | 663        |
| 82 | 683        | 677        | 682        | 675        | 677        | 674        | 676        | 677        | 677        | 669        | 668        | 666        | 666        |

|                            |            |            |            |            |            |            |            |            |            |            |            |            |            |
|----------------------------|------------|------------|------------|------------|------------|------------|------------|------------|------------|------------|------------|------------|------------|
| 83                         | 686        | 680        | 685        | 679        | 680        | 678        | 680        | 681        | 681        | 672        | 671        | 669        | 669        |
| 84                         | 690        | 684        | 688        | 682        | 684        | 682        | 684        | 684        | 684        | 675        | 674        | 672        | 672        |
| 85                         | 693        | 687        | 692        | 686        | 687        | 685        | 687        | 688        | 688        | 679        | 678        | 675        | 675        |
| 86                         | 696        | 691        | 695        | 690        | 691        | 689        | 691        | 691        | 692        | 683        | 682        | 680        | 679        |
| 87                         | 700        | 694        | 699        | 693        | 694        | 693        | 694        | 694        | 695        | 686        | 685        | 683        | 683        |
| 88                         | 703        | 698        | 702        | 697        | 698        | 697        | 698        | 698        | 699        | 690        | 689        | 687        | 687        |
| 89                         | 707        | 702        | 706        | 701        | 702        | 701        | 702        | 702        | 703        | 693        | 693        | 691        | 691        |
| <b>90</b>                  | <b>711</b> | <b>706</b> | <b>710</b> | <b>705</b> | <b>706</b> | <b>705</b> | <b>706</b> | <b>706</b> | <b>707</b> | <b>697</b> | <b>696</b> | <b>694</b> | <b>694</b> |
| 91                         | 716        | 710        | 714        | 709        | 710        | 709        | 710        | 711        | 711        | 701        | 701        | 699        | 698        |
| 92                         | 720        | 715        | 719        | 714        | 715        | 714        | 715        | 715        | 716        |            | 704        | 703        | 702        |
| 93                         | 739        | 720        | 734        |            | 720        | 719        | 720        | 720        | 723        |            | 709        | 707        | 706        |
| 94                         | 758        | 740        | 754        |            | 739        | 738        | 740        | 740        |            |            | 713        |            | 711        |
| 95                         | 778        | 761        | 774        |            | 760        | 759        |            |            |            |            | 718        |            | 716        |
| 96                         | 800        | 784        | 796        |            | 782        |            |            |            |            |            | 726        |            |            |
| 97                         | 829        | 812        | 825        |            |            |            |            |            |            |            | 736        |            |            |
| 98                         | 870        | 852        | 866        |            |            |            |            |            |            |            |            |            |            |
| 99                         | 932        | 915        | 928        |            |            |            |            |            |            |            |            |            |            |
| FBP 99,5                   | 975        | 961        | 973        |            |            |            |            |            |            |            |            |            |            |
| %Recovery                  | 105.380    | 101.030    | 101.190    | 92.425     | 96.412     | 95.481     | 94.301     | 94.884     | 93.401     | 91.248     | 97.329     | 93.431     | 95.830     |
|                            |            |            |            |            |            |            |            |            |            |            |            |            |            |
| Boiling<br>below 360°C     | -          | -          | -          | -          | -          | -          | -          | -          | -          | -          | 0.70       | 1.47       | -          |
| Boiling<br>below 540°C     | 16.50      | 19.00      | 15.67      | 19.33      | 19.33      | 19.67      | 16.50      | 15.00      | 15.00      | 18.33      | 17.67      | 18.00      | 18.00      |
| Boiling<br>above 540°C     | 83.50      | 81.00      | 84.33      | 80.67      | 80.67      | 80.33      | 83.50      | 85.00      | 85.00      | 81.67      | 82.33      | 82.00      | 82.00      |
| T50% - 540 +<br>Percentage | 58.25      | 59.50      | 57.83      | 59.67      | 59.67      | 59.83      | 58.25      | 57.50      | 57.50      | 59.17      | 58.83      | 59.00      | 59.00      |
| T50% - 540 +<br>Degree     | 620.5      | 619.0      | 620.7      | 617.3      | 618.3      | 616.7      | 616.5      | 616.5      | 616.0      | 615.3      | 615.7      | 613.0      | 614.0      |

Continuation  
of Table S7

| HTSD of H-<br>Oil VTB | 30.01.2023 | 06.02.2023 | 13.02.2023 | 20.02.2023 | 27.02.2023 | 06.03.2023 | 13.03.2023 | 20.03.2023 | 27.03.2023 | 03.04.2023 | 10.04.2023 | 18.04.2023 | 24.04.2023 |
|-----------------------|------------|------------|------------|------------|------------|------------|------------|------------|------------|------------|------------|------------|------------|
| wt. %                 | °C         |
| IBP 0.5               | 368        | 334        | 404        | 405        | 406        | 401        | 405        | 370        | 388        | 385        | 384        | 380        | 393        |
| 1                     | 391        | 355        | 419        | 420        | 420        | 416        | 419        | 384        | 402        | 398        | 397        | 392        | 405        |
| 2                     | 422        | 382        | 438        | 438        | 437        | 433        | 436        | 402        | 421        | 417        | 417        | 408        | 420        |
| 3                     | 443        | 402        | 451        | 451        | 450        | 447        | 448        | 415        | 434        | 430        | 430        | 420        | 432        |
| 4                     | 458        | 419        | 461        | 461        | 459        | 457        | 457        | 426        | 444        | 441        | 442        | 429        | 443        |
| 5                     | 471        | 433        | 471        | 470        | 467        | 466        | 465        | 435        | 453        | 450        | 451        | 439        | 453        |
| 6                     | 482        | 446        | 480        | 478        | 475        | 475        | 473        | 443        | 461        | 458        | 459        | 448        | 462        |
| 7                     | 490        | 458        | 488        | 486        | 482        | 482        | 480        | 451        | 469        | 466        | 467        | 456        | 471        |
| 8                     | 497        | 470        | 495        | 492        | 488        | 489        | 486        | 458        | 476        | 473        | 475        | 464        | 479        |
| 9                     | 503        | 480        | 502        | 498        | 494        | 495        | 492        | 464        | 483        | 480        | 482        | 472        | 487        |
| <b>10</b>             | <b>508</b> | <b>489</b> | <b>507</b> | <b>503</b> | <b>499</b> | <b>500</b> | <b>497</b> | <b>471</b> | <b>488</b> | <b>486</b> | <b>487</b> | <b>480</b> | <b>494</b> |
| 11                    | 513        | 497        | 513        | 508        | 504        | 505        | 502        | 478        | 494        | 491        | 493        | 487        | 501        |
| 12                    | 517        | 504        | 517        | 512        | 508        | 510        | 507        | 484        | 499        | 496        | 498        | 493        | 507        |
| 13                    | 521        | 510        | 522        | 516        | 512        | 514        | 511        | 489        | 503        | 501        | 502        | 499        | 512        |
| 14                    | 524        | 515        | 526        | 520        | 515        | 518        | 515        | 494        | 507        | 505        | 507        | 505        | 518        |
| 15                    | 528        | 519        | 530        | 524        | 519        | 521        | 519        | 499        | 511        | 509        | 511        | 510        | 522        |
| 16                    | 531        | 524        | 534        | 527        | 522        | 525        | 522        | 503        | 515        | 513        | 514        | 515        | 527        |
| 17                    | 534        | 528        | 537        | 530        | 525        | 528        | 525        | 508        | 518        | 516        | 518        | 520        | 531        |
| 18                    | 537        | 531        | 540        | 533        | 528        | 531        | 529        | 512        | 522        | 519        | 521        | 524        | 535        |
| 19                    | 539        | 535        | 543        | 536        | 531        | 534        | 532        | 515        | 525        | 522        | 524        | 528        | 538        |
| 20                    | 542        | 538        | 545        | 538        | 533        | 537        | 535        | 519        | 528        | 525        | 527        | 532        | 541        |

|    |     |     |     |     |     |     |     |     |     |     |     |     |     |
|----|-----|-----|-----|-----|-----|-----|-----|-----|-----|-----|-----|-----|-----|
| 21 | 544 | 540 | 548 | 541 | 536 | 539 | 537 | 522 | 530 | 528 | 530 | 536 | 544 |
| 22 | 546 | 543 | 550 | 543 | 538 | 541 | 540 | 525 | 533 | 531 | 532 | 539 | 547 |
| 23 | 549 | 545 | 553 | 545 | 540 | 544 | 542 | 528 | 536 | 534 | 535 | 542 | 550 |
| 24 | 551 | 548 | 555 | 548 | 543 | 546 | 544 | 531 | 538 | 536 | 537 | 545 | 553 |
| 25 | 553 | 550 | 557 | 550 | 545 | 548 | 546 | 534 | 540 | 538 | 540 | 548 | 555 |
| 26 | 555 | 553 | 560 | 552 | 547 | 550 | 549 | 536 | 542 | 541 | 542 | 550 | 558 |
| 27 | 557 | 555 | 562 | 554 | 549 | 552 | 551 | 539 | 545 | 543 | 544 | 553 | 560 |
| 28 | 559 | 557 | 564 | 556 | 551 | 554 | 553 | 541 | 547 | 545 | 546 | 556 | 562 |
| 29 | 561 | 559 | 566 | 558 | 553 | 556 | 555 | 543 | 549 | 547 | 548 | 558 | 564 |
| 30 | 563 | 561 | 567 | 560 | 555 | 558 | 557 | 545 | 551 | 549 | 550 | 560 | 566 |
| 31 | 564 | 563 | 569 | 561 | 557 | 560 | 559 | 548 | 553 | 551 | 552 | 562 | 568 |
| 32 | 566 | 565 | 571 | 563 | 558 | 562 | 561 | 550 | 555 | 553 | 554 | 564 | 570 |
| 33 | 568 | 567 | 573 | 565 | 560 | 564 | 563 | 552 | 557 | 555 | 556 | 566 | 572 |
| 34 | 569 | 568 | 574 | 567 | 562 | 565 | 564 | 554 | 558 | 557 | 558 | 568 | 574 |
| 35 | 571 | 570 | 576 | 568 | 563 | 567 | 566 | 556 | 560 | 559 | 560 | 570 | 575 |
| 36 | 573 | 572 | 577 | 570 | 565 | 569 | 568 | 558 | 562 | 560 | 561 | 572 | 577 |
| 37 | 574 | 573 | 579 | 571 | 567 | 570 | 569 | 560 | 564 | 562 | 563 | 574 | 579 |
| 38 | 576 | 575 | 581 | 573 | 568 | 572 | 571 | 562 | 566 | 564 | 565 | 576 | 580 |
| 39 | 577 | 576 | 582 | 575 | 570 | 573 | 573 | 564 | 567 | 566 | 567 | 577 | 582 |
| 40 | 579 | 578 | 584 | 576 | 572 | 575 | 574 | 565 | 569 | 567 | 568 | 579 | 584 |
| 41 | 581 | 580 | 586 | 578 | 573 | 576 | 576 | 567 | 571 | 569 | 570 | 581 | 585 |
| 42 | 582 | 581 | 587 | 579 | 575 | 578 | 577 | 569 | 572 | 571 | 572 | 583 | 587 |
| 43 | 584 | 583 | 589 | 581 | 576 | 580 | 579 | 571 | 574 | 572 | 573 | 584 | 589 |
| 44 | 586 | 585 | 591 | 583 | 578 | 581 | 581 | 572 | 575 | 574 | 575 | 586 | 590 |
| 45 | 587 | 586 | 592 | 584 | 580 | 583 | 582 | 574 | 577 | 576 | 577 | 588 | 592 |
| 46 | 589 | 588 | 594 | 586 | 581 | 585 | 584 | 576 | 579 | 577 | 578 | 590 | 594 |
| 47 | 591 | 590 | 595 | 587 | 583 | 586 | 586 | 578 | 580 | 579 | 580 | 591 | 595 |
| 48 | 592 | 591 | 597 | 589 | 584 | 588 | 587 | 579 | 582 | 581 | 582 | 593 | 597 |
| 49 | 594 | 593 | 599 | 591 | 586 | 589 | 589 | 581 | 584 | 582 | 583 | 595 | 598 |

|           |            |            |            |            |            |            |            |            |            |            |            |            |            |
|-----------|------------|------------|------------|------------|------------|------------|------------|------------|------------|------------|------------|------------|------------|
| <b>50</b> | <b>595</b> | <b>594</b> | <b>600</b> | <b>592</b> | <b>588</b> | <b>591</b> | <b>591</b> | <b>583</b> | <b>585</b> | <b>584</b> | <b>585</b> | <b>596</b> | <b>600</b> |
| 51        | 597        | 596        | 602        | 594        | 589        | 593        | 592        | 585        | 587        | 586        | 587        | 598        | 602        |
| 52        | 599        | 598        | 604        | 596        | 591        | 594        | 594        | 587        | 589        | 588        | 588        | 600        | 603        |
| 53        | 600        | 599        | 605        | 597        | 593        | 596        | 596        | 589        | 591        | 589        | 590        | 602        | 605        |
| 54        | 602        | 601        | 607        | 599        | 595        | 598        | 597        | 590        | 592        | 591        | 592        | 603        | 607        |
| 55        | 604        | 603        | 609        | 601        | 596        | 600        | 599        | 592        | 594        | 593        | 594        | 605        | 609        |
| 56        | 606        | 604        | 610        | 602        | 598        | 601        | 601        | 594        | 596        | 595        | 596        | 607        | 610        |
| 57        | 608        | 606        | 612        | 604        | 600        | 603        | 603        | 596        | 598        | 597        | 598        | 609        | 612        |
| 58        | 609        | 608        | 614        | 606        | 602        | 605        | 604        | 598        | 600        | 598        | 599        | 611        | 614        |
| 59        | 611        | 610        | 616        | 608        | 604        | 607        | 606        | 600        | 601        | 600        | 601        | 612        | 615        |
| 60        | 613        | 612        | 618        | 610        | 605        | 609        | 608        | 602        | 603        | 602        | 603        | 614        | 617        |
| 61        | 615        | 613        | 620        | 612        | 607        | 611        | 610        | 604        | 605        | 604        | 605        | 616        | 619        |
| 62        | 617        | 615        | 622        | 614        | 609        | 612        | 612        | 606        | 607        | 606        | 607        | 618        | 621        |
| 63        | 619        | 617        | 623        | 616        | 611        | 614        | 614        | 608        | 609        | 608        | 609        | 620        | 623        |
| 64        | 621        | 619        | 625        | 618        | 613        | 616        | 616        | 610        | 611        | 610        | 611        | 622        | 625        |
| 65        | 623        | 621        | 627        | 620        | 615        | 619        | 618        | 612        | 613        | 612        | 613        | 624        | 627        |
| 66        | 625        | 623        | 629        | 622        | 618        | 621        | 620        | 615        | 615        | 614        | 615        | 626        | 629        |
| 67        | 627        | 625        | 631        | 624        | 620        | 623        | 622        | 617        | 618        | 617        | 618        | 628        | 631        |
| 68        | 629        | 627        | 633        | 626        | 622        | 625        | 625        | 619        | 620        | 619        | 620        | 630        | 632        |
| 69        | 631        | 630        | 635        | 628        | 624        | 627        | 627        | 622        | 622        | 621        | 622        | 632        | 634        |
| <b>70</b> | <b>633</b> | <b>632</b> | <b>638</b> | <b>631</b> | <b>626</b> | <b>629</b> | <b>629</b> | <b>624</b> | <b>624</b> | <b>624</b> | <b>625</b> | <b>634</b> | <b>637</b> |
| 71        | 636        | 634        | 640        | 633        | 629        | 632        | 631        | 626        | 627        | 626        | 627        | 637        | 639        |
| 72        | 638        | 636        | 642        | 635        | 631        | 634        | 633        | 629        | 629        | 628        | 629        | 639        | 641        |
| 73        | 640        | 638        | 645        | 637        | 633        | 636        | 636        | 631        | 631        | 631        | 632        | 641        | 643        |
| 74        | 642        | 641        | 647        | 640        | 636        | 639        | 638        | 634        | 634        | 633        | 634        | 644        | 646        |
| 75        | 645        | 643        | 649        | 643        | 638        | 641        | 641        | 636        | 636        | 635        | 637        | 646        | 648        |
| 76        | 647        | 646        | 652        | 645        | 641        | 644        | 644        | 639        | 639        | 638        | 640        | 649        | 651        |
| 77        | 650        | 648        | 654        | 648        | 644        | 647        | 646        | 642        | 642        | 641        | 642        | 651        | 653        |
| 78        | 652        | 651        | 656        | 651        | 647        | 649        | 649        | 645        | 645        | 644        | 645        | 654        | 655        |

|           |        |         |        |        |        |        |        |        |        |        |         |        |         |
|-----------|--------|---------|--------|--------|--------|--------|--------|--------|--------|--------|---------|--------|---------|
| 79        | 655    | 653     | 659    | 653    | 649    | 652    | 652    | 648    | 647    | 647    | 649     | 656    | 657     |
| 80        | 657    | 656     | 662    | 656    | 652    | 654    | 654    | 651    | 650    | 650    | 651     | 659    | 660     |
| 81        | 660    | 658     | 666    | 659    | 655    | 657    | 657    | 654    | 653    | 653    | 654     | 662    | 664     |
| 82        | 663    | 661     | 669    | 662    | 658    | 660    | 660    | 657    | 656    | 656    | 657     | 666    | 667     |
| 83        | 666    | 665     | 672    | 666    | 661    | 664    | 664    | 660    | 659    | 659    | 661     | 669    | 671     |
| 84        | 670    | 668     | 675    | 670    | 665    | 668    | 668    | 664    | 663    | 663    | 665     | 673    | 674     |
| 85        | 673    | 672     | 679    | 673    | 669    | 672    | 672    | 669    | 667    | 667    | 669     | 676    | 677     |
| 86        | 676    | 675     | 683    | 677    | 673    | 675    | 675    | 672    | 671    | 671    | 673     | 680    | 681     |
| 87        | 680    | 679     | 687    | 682    | 677    | 679    | 679    | 676    | 675    | 675    | 677     | 684    | 685     |
| 88        | 684    | 683     | 691    | 686    | 682    | 684    | 684    | 681    | 679    | 680    | 682     | 688    | 689     |
| 89        | 688    | 687     | 694    | 690    | 686    | 688    | 688    | 685    | 684    | 684    | 686     | 692    | 692     |
| 90        | 692    | 691     | 698    | 694    | 690    | 692    | 692    | 690    | 688    | 689    | 691     | 695    | 696     |
| 91        | 695    | 695     |        | 698    | 694    | 696    | 696    | 694    | 693    | 694    | 695     | 700    | 701     |
| 92        | 700    | 699     |        | 703    | 700    | 701    | 701    | 699    | 698    | 699    | 700     | 704    | 704     |
| 93        | 704    | 704     |        |        | 704    | 706    | 706    |        | 703    | 703    | 705     | 708    | 709     |
| 94        | 708    | 708     |        |        |        |        | 712    |        | 708    | 709    | 711     | 714    | 714     |
| 95        | 714    | 714     |        |        |        |        | 717    |        | 714    | 715    | 717     | 719    | 719     |
| 96        | 719    | 720     |        |        |        |        | 734    |        | 721    | 725    | 731     | 738    | 740     |
| 97        | 729    | 731     |        |        |        |        |        |        | 749    | 754    | 760     | 767    | 768     |
| 98        |        | 754     |        |        |        |        |        |        |        | 797    | 804     | 808    | 810     |
| 99        |        | 794     |        |        |        |        |        |        |        | 864    | 873     | 872    | 876     |
| FBP 99,5  |        | 823     |        |        |        |        |        |        |        |        | 924     | 919    | 924     |
| %Recovery | 97.628 | 104.270 | 90.475 | 92.147 | 93.855 | 93.933 | 96.625 | 92.948 | 97.560 | 99.416 | 101.660 | 99.985 | 101.650 |

|                        |       |       |       |       |       |       |       |       |       |       |       |       |       |
|------------------------|-------|-------|-------|-------|-------|-------|-------|-------|-------|-------|-------|-------|-------|
| Boiling<br>below 360°C | -     | 1.19  | -     | -     | -     | -     | -     | -     | -     | -     | -     | -     | -     |
| Boiling<br>below 540°C | 19.33 | 21.00 | 18.00 | 20.67 | 23.00 | 21.50 | 22.00 | 27.50 | 25.00 | 25.67 | 25.00 | 22.33 | 19.67 |



|                            |       |       |       |       |       |       |       |       |       |       |       |       |       |
|----------------------------|-------|-------|-------|-------|-------|-------|-------|-------|-------|-------|-------|-------|-------|
| Boiling<br>above 540°C     | 80.67 | 79.00 | 82.00 | 79.33 | 77.00 | 78.50 | 78.00 | 72.50 | 75.00 | 74.33 | 75.00 | 77.67 | 80.33 |
| T50% - 540 +<br>Percentage | 59.67 | 60.50 | 59.00 | 60.33 | 61.50 | 60.75 | 61.00 | 63.75 | 62.50 | 62.83 | 62.50 | 61.17 | 59.83 |
| T50% - 540 +<br>Degree     | 612.3 | 612.5 | 616.0 | 610.7 | 608.0 | 610.5 | 610.0 | 609.5 | 608.0 | 607.7 | 608.0 | 616.3 | 616.7 |
|                            |       |       |       |       |       |       |       |       |       |       |       |       |       |

Continuation  
of Table S7

| HTSD of H-<br>Oil VTB | 28.04.2023 | 09.05.2023 | 15.05.2023 | 22.05.2023 | 29.05.2023 | 05.06.2023 | 12.06.2023 | 19.06.2023 | 26.06.2023 | 03.07.2023 | 10.07.2023 | 17.07.2023 | 24.07.2023 |
|-----------------------|------------|------------|------------|------------|------------|------------|------------|------------|------------|------------|------------|------------|------------|
| wt. %                 | °C         |
| IBP 0.5               | 405        | 362        | 326        | 396        | 396        | 388        | 391        | 382        | 367        | 397        | 432        | 434        | 415        |
| 1                     | 416        | 377        | 360        | 408        | 407        | 399        | 402        | 393        | 381        | 409        | 441        | 442        | 431        |
| 2                     | 431        | 398        | 389        | 423        | 421        | 415        | 417        | 409        | 399        | 429        | 459        | 461        | 444        |
| 3                     | 442        | 413        | 407        | 435        | 432        | 426        | 428        | 421        | 410        | 439        | 473        | 473        | 460        |
| 4                     | 452        | 425        | 421        | 443        | 439        | 435        | 437        | 431        | 422        | 446        | 483        | 482        | 472        |
| 5                     | 460        | 435        | 432        | 452        | 446        | 443        | 444        | 438        | 432        | 458        | 494        | 492        | 480        |
| 6                     | 468        | 444        | 441        | 462        | 453        | 450        | 451        | 445        | 438        | 469        | 501        | 499        | 489        |
| 7                     | 475        | 454        | 449        | 470        | 461        | 459        | 460        | 451        | 443        | 474        | 506        | 505        | 497        |
| 8                     | 482        | 464        | 460        | 476        | 468        | 467        | 467        | 459        | 447        | 480        | 511        | 509        | 502        |
| 9                     | 488        | 473        | 468        | 482        | 473        | 473        | 473        | 466        | 455        | 486        | 517        | 515        | 506        |
| 10                    | 494        | 480        | 475        | 489        | 478        | 478        | 478        | 471        | 464        | 493        | 522        | 520        | 511        |
| 11                    | 499        | 488        | 482        | 495        | 483        | 484        | 483        | 475        | 468        | 498        | 526        | 524        | 516        |
| 12                    | 504        | 494        | 489        | 499        | 488        | 489        | 489        | 479        | 472        | 502        | 530        | 527        | 521        |
| 13                    | 509        | 500        | 495        | 504        | 493        | 494        | 494        | 484        | 476        | 505        | 533        | 531        | 524        |
| 14                    | 513        | 505        | 500        | 508        | 498        | 499        | 498        | 488        | 479        | 509        | 536        | 534        | 527        |

|    |     |     |     |     |     |     |     |     |     |     |     |     |     |
|----|-----|-----|-----|-----|-----|-----|-----|-----|-----|-----|-----|-----|-----|
| 15 | 517 | 510 | 504 | 512 | 502 | 503 | 502 | 492 | 483 | 513 | 539 | 537 | 530 |
| 16 | 521 | 514 | 508 | 516 | 505 | 506 | 506 | 496 | 488 | 517 | 542 | 540 | 533 |
| 17 | 525 | 519 | 513 | 519 | 509 | 510 | 509 | 499 | 493 | 520 | 545 | 542 | 536 |
| 18 | 528 | 522 | 517 | 523 | 512 | 513 | 513 | 502 | 497 | 523 | 548 | 545 | 539 |
| 19 | 532 | 526 | 520 | 526 | 516 | 517 | 516 | 505 | 499 | 526 | 550 | 548 | 541 |
| 20 | 535 | 529 | 524 | 529 | 519 | 520 | 519 | 507 | 502 | 529 | 553 | 550 | 544 |
| 21 | 538 | 532 | 527 | 531 | 522 | 523 | 522 | 510 | 504 | 531 | 555 | 552 | 546 |
| 22 | 541 | 535 | 530 | 534 | 525 | 526 | 525 | 513 | 507 | 534 | 557 | 555 | 549 |
| 23 | 543 | 537 | 532 | 536 | 528 | 528 | 528 | 516 | 509 | 536 | 560 | 557 | 551 |
| 24 | 546 | 540 | 535 | 539 | 530 | 531 | 530 | 518 | 512 | 539 | 562 | 559 | 553 |
| 25 | 548 | 542 | 537 | 541 | 533 | 533 | 532 | 521 | 515 | 541 | 564 | 561 | 556 |
| 26 | 551 | 545 | 540 | 543 | 535 | 536 | 535 | 523 | 518 | 543 | 566 | 563 | 558 |
| 27 | 553 | 547 | 542 | 545 | 537 | 538 | 537 | 525 | 521 | 546 | 568 | 565 | 560 |
| 28 | 555 | 549 | 544 | 548 | 540 | 540 | 539 | 527 | 523 | 548 | 569 | 567 | 562 |
| 29 | 558 | 552 | 547 | 550 | 542 | 542 | 541 | 530 | 525 | 550 | 571 | 569 | 564 |
| 30 | 560 | 554 | 549 | 552 | 544 | 544 | 543 | 532 | 527 | 552 | 573 | 570 | 566 |
| 31 | 562 | 556 | 551 | 554 | 546 | 546 | 545 | 534 | 529 | 555 | 575 | 572 | 567 |
| 32 | 564 | 558 | 553 | 556 | 548 | 549 | 548 | 536 | 531 | 557 | 576 | 574 | 569 |
| 33 | 565 | 560 | 555 | 558 | 551 | 551 | 550 | 538 | 533 | 559 | 578 | 576 | 571 |
| 34 | 567 | 562 | 557 | 560 | 553 | 553 | 552 | 540 | 536 | 561 | 580 | 577 | 573 |
| 35 | 569 | 564 | 559 | 561 | 555 | 555 | 554 | 542 | 538 | 563 | 582 | 579 | 574 |
| 36 | 571 | 565 | 561 | 563 | 557 | 557 | 556 | 544 | 540 | 565 | 584 | 581 | 576 |
| 37 | 573 | 567 | 563 | 565 | 559 | 559 | 558 | 546 | 542 | 567 | 585 | 583 | 578 |
| 38 | 574 | 569 | 565 | 567 | 560 | 560 | 559 | 548 | 544 | 568 | 587 | 584 | 580 |
| 39 | 576 | 571 | 567 | 569 | 562 | 562 | 561 | 550 | 546 | 570 | 589 | 586 | 581 |
| 40 | 578 | 572 | 568 | 570 | 564 | 564 | 563 | 552 | 548 | 572 | 591 | 588 | 583 |
| 41 | 579 | 574 | 570 | 572 | 566 | 566 | 565 | 554 | 550 | 574 | 592 | 590 | 585 |
| 42 | 581 | 576 | 572 | 574 | 568 | 567 | 567 | 556 | 552 | 576 | 594 | 591 | 587 |
| 43 | 583 | 578 | 574 | 575 | 569 | 569 | 568 | 557 | 554 | 578 | 596 | 593 | 588 |

|    |     |     |     |     |     |     |     |     |     |     |     |     |     |
|----|-----|-----|-----|-----|-----|-----|-----|-----|-----|-----|-----|-----|-----|
| 44 | 585 | 579 | 575 | 577 | 571 | 571 | 570 | 559 | 556 | 580 | 598 | 595 | 590 |
| 45 | 586 | 581 | 577 | 579 | 573 | 573 | 572 | 561 | 558 | 581 | 599 | 597 | 592 |
| 46 | 588 | 583 | 579 | 581 | 575 | 574 | 573 | 563 | 560 | 583 | 601 | 598 | 594 |
| 47 | 590 | 585 | 581 | 582 | 576 | 576 | 575 | 565 | 562 | 585 | 603 | 600 | 595 |
| 48 | 591 | 587 | 583 | 584 | 578 | 578 | 577 | 567 | 564 | 587 | 605 | 602 | 597 |
| 49 | 593 | 588 | 585 | 586 | 580 | 580 | 579 | 568 | 566 | 589 | 607 | 604 | 599 |
| 50 | 595 | 590 | 586 | 588 | 582 | 582 | 580 | 570 | 568 | 591 | 609 | 606 | 601 |
| 51 | 597 | 592 | 588 | 590 | 584 | 583 | 582 | 572 | 570 | 593 | 611 | 608 | 603 |
| 52 | 598 | 594 | 590 | 591 | 586 | 585 | 584 | 574 | 572 | 595 | 612 | 609 | 605 |
| 53 | 600 | 595 | 592 | 593 | 588 | 587 | 586 | 576 | 573 | 597 | 614 | 611 | 607 |
| 54 | 602 | 597 | 594 | 595 | 589 | 589 | 588 | 578 | 575 | 599 | 616 | 613 | 609 |
| 55 | 604 | 599 | 596 | 597 | 591 | 591 | 590 | 580 | 577 | 601 | 618 | 615 | 611 |
| 56 | 606 | 601 | 597 | 599 | 593 | 593 | 592 | 582 | 579 | 603 | 620 | 617 | 612 |
| 57 | 607 | 603 | 599 | 600 | 595 | 595 | 593 | 584 | 581 | 605 | 622 | 619 | 614 |
| 58 | 609 | 605 | 601 | 602 | 597 | 597 | 595 | 586 | 584 | 607 | 624 | 621 | 617 |
| 59 | 611 | 607 | 603 | 605 | 599 | 598 | 597 | 588 | 586 | 610 | 626 | 623 | 619 |
| 60 | 613 | 609 | 606 | 607 | 601 | 600 | 599 | 590 | 588 | 612 | 629 | 625 | 621 |
| 61 | 615 | 611 | 608 | 609 | 603 | 603 | 601 | 592 | 590 | 614 | 631 | 627 | 623 |
| 62 | 617 | 613 | 610 | 611 | 605 | 605 | 604 | 594 | 592 | 616 | 633 | 630 | 625 |
| 63 | 619 | 615 | 612 | 613 | 607 | 607 | 606 | 596 | 594 | 619 | 635 | 632 | 627 |
| 64 | 621 | 617 | 614 | 615 | 610 | 609 | 608 | 599 | 597 | 621 | 637 | 634 | 630 |
| 65 | 623 | 619 | 616 | 617 | 612 | 611 | 610 | 601 | 599 | 623 | 639 | 636 | 632 |
| 66 | 625 | 621 | 618 | 619 | 614 | 613 | 612 | 603 | 601 | 626 | 641 | 638 | 634 |
| 67 | 627 | 624 | 621 | 621 | 616 | 616 | 614 | 606 | 604 | 628 | 644 | 640 | 636 |
| 68 | 629 | 626 | 623 | 624 | 618 | 618 | 617 | 608 | 606 | 631 | 646 | 643 | 638 |
| 69 | 631 | 628 | 625 | 626 | 621 | 620 | 619 | 611 | 609 | 633 | 648 | 645 | 641 |
| 70 | 633 | 631 | 628 | 628 | 623 | 623 | 621 | 613 | 611 | 636 | 651 | 647 | 643 |
| 71 | 636 | 633 | 630 | 631 | 626 | 625 | 624 | 616 | 614 | 638 | 653 | 650 | 646 |
| 72 | 638 | 636 | 633 | 633 | 628 | 628 | 627 | 619 | 617 | 641 | 655 | 652 | 649 |

|           |         |        |        |        |        |        |        |        |        |        |        |        |        |
|-----------|---------|--------|--------|--------|--------|--------|--------|--------|--------|--------|--------|--------|--------|
| 73        | 640     | 638    | 635    | 636    | 631    | 631    | 629    | 621    | 620    | 644    | 658    | 655    | 651    |
| 74        | 643     | 641    | 638    | 638    | 633    | 633    | 632    | 624    | 623    | 647    | 661    | 657    | 654    |
| 75        | 645     | 643    | 640    | 641    | 636    | 636    | 634    | 627    | 626    | 649    | 664    | 660    | 656    |
| 76        | 648     | 646    | 643    | 644    | 639    | 638    | 637    | 630    | 629    | 652    | 667    | 663    | 659    |
| 77        | 651     | 649    | 646    | 646    | 642    | 641    | 640    | 633    | 632    | 655    | 670    | 666    | 662    |
| 78        | 653     | 652    | 649    | 649    | 645    | 644    | 643    | 636    | 635    | 658    | 673    | 669    | 666    |
| 79        | 655     | 655    | 652    | 652    | 648    | 647    | 646    | 640    | 638    | 661    | 675    | 672    | 669    |
| 80        | 658     | 657    | 655    | 655    | 651    | 651    | 649    | 643    | 642    | 665    | 679    | 675    | 672    |
| 81        | 661     | 661    | 658    | 658    | 654    | 654    | 652    | 647    | 645    | 669    | 682    | 678    | 675    |
| 82        | 665     | 665    | 662    | 662    | 657    | 657    | 655    | 650    | 649    | 672    | 685    | 682    | 679    |
| 83        | 668     | 669    | 666    | 666    | 661    | 661    | 659    | 654    | 653    | 676    | 688    | 685    | 683    |
| 84        | 672     | 672    | 670    | 670    | 665    | 665    | 663    | 657    | 656    | 680    | 691    | 688    | 686    |
| 85        | 675     | 676    | 674    | 673    | 669    | 669    | 667    | 662    | 661    | 684    | 694    | 691    | 690    |
| 86        | 679     | 681    | 678    | 678    | 673    | 673    | 671    | 667    | 666    | 687    | 697    | 694    | 693    |
| 87        | 683     | 685    | 683    | 682    | 678    | 678    | 675    | 672    | 671    | 691    | 701    | 698    | 696    |
| 88        | 687     | 690    | 687    | 686    | 683    | 683    | 680    | 676    | 675    | 694    | 704    | 701    | 700    |
| 89        | 691     | 694    | 692    | 691    | 687    | 687    | 685    | 682    | 681    | 699    | 708    | 705    | 704    |
| 90        | 694     | 698    | 695    | 695    | 692    | 692    | 690    | 687    |        |        | 712    | 709    | 708    |
| 91        | 699     | 703    | 701    | 700    | 696    | 696    |        | 692    |        |        |        |        | 713    |
| 92        | 703     | 707    | 705    | 704    |        |        |        | 698    |        |        |        |        |        |
| 93        | 708     | 713    |        |        |        |        |        | 703    |        |        |        |        |        |
| 94        | 713     | 719    |        |        |        |        |        | 709    |        |        |        |        |        |
| 95        | 718     |        |        |        |        |        |        |        |        |        |        |        |        |
| 96        | 736     |        |        |        |        |        |        |        |        |        |        |        |        |
| 97        | 764     |        |        |        |        |        |        |        |        |        |        |        |        |
| 98        | 806     |        |        |        |        |        |        |        |        |        |        |        |        |
| 99        | 872     |        |        |        |        |        |        |        |        |        |        |        |        |
| FBP 99,5  | 921     |        |        |        |        |        |        |        |        |        |        |        |        |
| %Recovery | 100.310 | 94.516 | 92.656 | 92.056 | 91.776 | 91.945 | 90.199 | 94.176 | 89.762 | 89.182 | 90.170 | 90.699 | 91.368 |

|                            |       |       |       |       |       |       |       |       |       |       |       |       |       |
|----------------------------|-------|-------|-------|-------|-------|-------|-------|-------|-------|-------|-------|-------|-------|
| Boiling<br>below 360°C     | -     | -     |       | -     | -     | -     | -     | -     | -     | -     | -     | -     |       |
| Boiling<br>below 540°C     | 21.67 | 24.00 | 26.00 | 24.50 | 28.00 | 28.00 | 28.50 | 34.00 | 36.00 | 24.50 | 15.33 | 16.00 | 18.33 |
| Boiling<br>above 540°C     | 78.33 | 76.00 | 74.00 | 75.50 | 72.00 | 72.00 | 71.50 | 66.00 | 64.00 | 75.50 | 84.67 | 84.00 | 81.67 |
| T50% - 540 +<br>Percentage | 60.83 | 62.00 | 63.00 | 62.25 | 64.00 | 64.00 | 64.25 | 67.00 | 68.00 | 62.25 | 57.67 | 58.00 | 59.17 |
| T50% - 540 +<br>Degree     | 614.7 | 613.0 | 612.0 | 611.5 | 610.0 | 609.0 | 608.5 | 606.0 | 606.0 | 616.8 | 623.3 | 621.0 | 619.5 |

**Table S8.** Content of metals in H-Oil feed and VTB

**H-**

**Oil**

**Feed**

**H-Oil**

**VTB**

| Date       | V,<br>mg/kg | Ni,<br>mg/kg | Na,<br>mg/kg | Fe,<br>mg/kg | Al,<br>mg/kg | Ca,<br>mg/kg | V,<br>mg/kg | Ni,<br>mg/kg | Na,<br>mg/kg | Fe,<br>mg/kg | Al,<br>mg/kg | Ca,<br>mg/kg |
|------------|-------------|--------------|--------------|--------------|--------------|--------------|-------------|--------------|--------------|--------------|--------------|--------------|
| 11.04.2022 | 105.1       | 20.8         |              |              |              |              | 165.2       | 40.9         |              |              |              |              |
| 23.05.2022 | 196         | 30.2         | 12.3         | 32.2         | 32.2         | 4.2          | 140         | 40           | 18.7         | 95.7         | 64.7         | 19.3         |
| 30.05.2022 | 151         | 29.3         | 7.5          | 27.2         | 25.3         | 2.5          | 106         | 40.5         | 8.3          | 94           | 49.7         | 6.9          |
| 06.06.2022 | 122         | 27.2         | 6.5          | 22           | 11.5         | 1.5          | 73          | 27.9         | 6.6          | 75.8         | 44           | 4.5          |
| 13.06.2022 | 134         | 39.1         | 8.2          | 24.3         | 10           | 1.2          | 75          | 38.3         | 7.9          | 73.5         | 37.6         | 4            |
| 20.06.2022 | 118         | 36           | 4.2          | 22.6         | 21.2         | 1.1          | 53          | 29.7         | 1.8          | 51.3         | 34.8         | 3            |
| 27.06.2022 | 129         | 31.9         | 2.1          | 25.5         | 24.9         | 0.9          | 70          | 35.9         | 1.1          | 73.8         | 41.9         | 3.1          |
| 04.07.2022 | 124         | 35.5         | 4.7          | 25           | 21.9         | 0.8          | 66          | 36.7         | 1            | 82.5         | 44.1         | 2.9          |
| 11.07.2022 | 126         | 36           | 2.7          | 25.3         | 22.2         | 0.85         | 66          | 36.4         | 1            | 81.9         | 43.7         | 2.9          |
| 05.09.2022 | 179         | 45.7         | 8.6          | 38.2         | 12.6         | 2.1          | 122.3       | 50.1         | 1            | 148.9        | 51.8         | 6.6          |
| 03.10.2022 | 113         | 30.2         | 8.4          | 29.6         | 12.9         | 1.5          | 91          | 45.9         | 2.9          | 12.5         | 95.1         | 4.6          |
| 28.11.2022 | 181         | 33.4         | 9.2          | 34.4         | 18.2         | 2.8          | 21.1        | 10.8         | 2.4          | 27.5         | 10.6         | 1.7          |

|                                                                                 |       |      |      |      |      |      |       |      |       |       |       |      |
|---------------------------------------------------------------------------------|-------|------|------|------|------|------|-------|------|-------|-------|-------|------|
| 03.01.2023                                                                      | 139.6 | 38.3 | 6.4  | 45.5 | 20.3 | 4.4  | 87.8  | 59.9 | 4.4   | 151.5 | 72.1  | 6.4  |
| 30.01.2023                                                                      | 165.8 | 48.3 | 19.5 | 59.9 | 16.5 | 2.2  | 99    | 78.4 | 8.4   | 159.3 | 56.6  | 5.1  |
| 06.02.2023                                                                      | 147.7 | 40.9 | 3.6  | 41   | 24   | 3.1  | 57    | 48.6 | 2.3   | 100.7 | 65    | 5.9  |
| 13.02.2023                                                                      | 140.2 | 32.3 | 3.3  | 33.1 | 14   | 2.8  | 42.4  | 30.3 | 0.95  | 71.5  | 54.4  | 5.9  |
| 20.02.2023                                                                      | 145.2 | 37.4 | 3.7  | 34.5 | 26   | 4.7  | 43.3  | 34.1 | 1.4   | 66.1  | 39.6  | 5.2  |
| 27.02.2023                                                                      | 159.5 | 42.8 | 5.2  | 43.3 | 14.7 | 2    | 59.4  | 38.9 | 3.3   | 101.1 | 57.1  | 4.7  |
| 06.03.2023                                                                      | 152.1 | 39.2 | 6.7  | 54.7 | 12.9 | 2    | 57.1  | 34.1 | 3.2   | 111.7 | 49.4  | 4.3  |
| 13.03.2023                                                                      | 122.5 | 34.1 | 5.5  | 46.8 | 19.7 | 1.6  | 57.6  | 33.5 | 2.1   | 137.7 | 86.4  | 5.3  |
| 20.03.2023                                                                      | 151   | 42.6 | 9.1  | 40.7 | 21.6 | 2.3  | 93.4  | 53.7 | 7.4   | 173   | 139   | 6.6  |
| 27.03.2023                                                                      | 165.9 | 34.1 | 12.1 | 47.6 | 21.7 | 2.9  | 73.5  | 44.7 | 11.2  | 126.4 | 88.6  | 5.3  |
| 03.04.2023                                                                      | 182.1 | 47.8 | 14   | 61.4 | 22.3 | 6.5  | 61.4  | 46.5 | 7.5   | 109.4 | 80.9  | 9.5  |
| 10.04.2023                                                                      | 136.4 | 38.1 | 11.1 | 42.6 | 53   | 2.6  | 79.9  | 50.7 | 8.2   | 138   | 171.9 | 5.8  |
| 18.04.2023                                                                      | 102.5 | 34.8 | 7.3  | 30   | 9.3  | 7.5  | 74.6  | 48.8 | 6.2   | 124.5 | 66.2  | 15.6 |
| 24.04.2023                                                                      | 102   | 29.7 | 3.5  | 34   | 7    | 12.4 | 136.9 | 49.3 | 2.3   | 202   | 78.3  | 14.9 |
| 28.04.2023                                                                      | 137   | 31.8 | 6    | 33.6 | 6.9  | 2.6  | 165.2 | 48.8 | 3.9   | 218.8 | 70.6  | 11.3 |
| 09.05.2023                                                                      | 150   | 38.7 | 7.2  | 46   | 21.4 | 5.2  | 109.4 | 51.6 | 6.9   | 203.4 | 84    | 7    |
| 15.05.2023                                                                      | 189.4 | 53.5 | 12.2 | 49.2 | 18.1 | 1.8  | 106.1 | 58   | 2.3   | 149   | 67.9  | 4.8  |
| 22.05.2023                                                                      | 190.6 | 43.4 | 11.3 | 45.5 | 15.2 | 4    | 119.9 | 58.6 | 0.095 | 144.8 | 70.6  | 6    |
| 29.05.2023                                                                      | 170.6 | 46.6 | 9.4  | 35.5 | 17.6 | 1.5  | 98.3  | 65.4 | 7.7   | 136.1 | 61.7  | 4.7  |
| 05.06.2023                                                                      | 151.5 | 48.9 | 5.9  | 41.6 | 19.2 | 1.6  | 176.3 | 71.7 | 6.3   | 239.4 | 141.2 | 6.3  |
| 12.06.2023                                                                      | 146.5 | 49.7 | 7.2  | 53.6 | 18.5 | 1.7  | 147.1 | 82.8 | 3.6   | 187.5 | 88.3  | 5.8  |
| 19.06.2023                                                                      | 133   | 36.6 | 6.8  | 34.1 | 17.3 | 2.4  | 82.2  | 49.5 | 10    | 99.4  | 57.9  | 3.8  |
| 26.06.2023                                                                      | 148.5 | 32.1 | 1.7  | 40.8 | 17   | 2.3  | 93.8  | 53.4 | 3.8   | 113.7 | 63.4  | 5.5  |
| 03.07.2023                                                                      | 210.4 | 48.4 | 9.6  | 48.8 | 14.5 | 1.9  | 251.5 | 81   | 3.7   | 282   | 100.5 | 7.4  |
| 10.07.2023                                                                      | 226   | 45.4 | 12.7 | 50.9 | 12.4 | 1.7  | 218   | 48.9 | 7.3   | 206.1 | 54.4  | 5.5  |
| 17.07.2023                                                                      | 203   | 46.7 | 4.3  | 57.1 | 13.3 | 2.3  | 152.5 | 65.2 | < 1,0 | 202.5 | 46    | 4.7  |
| 17.07.2023 (after filtration of VTБ by removing sediments in the HFT apparatus) |       |      |      |      |      |      | 26    | 33.7 | < 1,0 | 21.6  | 2.1   | 2.5  |
| 24.07.2023                                                                      | 201.2 | 45.4 | 12.8 | 60   | 12.2 | 2.4  | 131.1 | 51.7 | 9     | 163.6 | 39    | 4.7  |

**Table S9.** H-Oil product yields obtained during the study of the 40 cases

| No | Date       | Gas, wt. % | Naphtha, wt. % | Diesel, wt. % | VGO, wt. % | VTB, wt. % | H <sub>2</sub> S, wt. % | Total, wt. % | Balance conversion<br>(100-(VTB+H <sub>2</sub> S)), wt. % |
|----|------------|------------|----------------|---------------|------------|------------|-------------------------|--------------|-----------------------------------------------------------|
| 1  | 11.04.2022 | 5.7        | 4.7            | 26.7          | 25.0       | 37.0       | 2.9                     | 102.0        | 60.1                                                      |
| 2  | 23.05.2022 | 5.8        | 5.6            | 32.5          | 29.7       | 25.9       | 2.7                     | 102.1        | 71.4                                                      |
| 3  | 30.05.2022 | 5.5        | 4.5            | 30.1          | 32.1       | 27.5       | 2.3                     | 101.9        | 70.2                                                      |
| 4  | 06.06.2022 | 5.4        | 5.1            | 28.3          | 34.4       | 26.6       | 2.1                     | 101.9        | 71.2                                                      |
| 5  | 13.06.2022 | 5.1        | 4.3            | 27.6          | 35.4       | 27.5       | 2.1                     | 101.9        | 70.5                                                      |
| 6  | 20.06.2022 | 5.7        | 5.6            | 31.6          | 35.4       | 21.8       | 1.9                     | 102.0        | 76.3                                                      |
| 7  | 27.06.2022 | 5.8        | 5.4            | 33.5          | 35.8       | 19.6       | 2.0                     | 102.0        | 78.4                                                      |
| 8  | 04.07.2022 | 6.0        | 6.2            | 33.9          | 36.9       | 17.1       | 2.0                     | 102.0        | 81.0                                                      |
| 9  | 11.07.2022 | 6.1        | 6.2            | 34.0          | 37.0       | 16.7       | 2.0                     | 102.0        | 81.4                                                      |
| 10 | 05.09.2022 | 6.8        | 6.1            | 34.6          | 32.4       | 19.3       | 2.8                     | 102.1        | 77.8                                                      |
| 11 | 03.10.2022 | 5.6        | 5.9            | 37.0          | 40.6       | 10.6       | 2.1                     | 101.9        | 87.2                                                      |
| 12 | 28.11.2022 | 6.9        | 6.7            | 36.5          | 35.9       | 14.1       | 2.1                     | 102.3        | 83.7                                                      |
| 13 | 03.01.2023 | 6.5        | 6.5            | 30.0          | 34.7       | 21.9       | 2.6                     | 102.2        | 75.5                                                      |
| 14 | 30.01.2023 | 6.3        | 7.1            | 30.8          | 34.2       | 21.3       | 2.5                     | 102.3        | 76.2                                                      |
| 15 | 06.02.2023 | 6.7        | 6.2            | 36.1          | 36.4       | 15.1       | 2.1                     | 102.5        | 82.8                                                      |
| 16 | 13.02.2023 | 6.8        | 6.0            | 32.8          | 41.8       | 13.2       | 2.0                     | 102.5        | 84.8                                                      |
| 17 | 20.02.2023 | 7.1        | 6.5            | 34.8          | 37.9       | 14.3       | 2.1                     | 102.7        | 83.6                                                      |
| 18 | 27.02.2023 | 7.1        | 6.5            | 35.1          | 38.4       | 13.6       | 2.0                     | 102.7        | 84.3                                                      |
| 19 | 06.03.2023 | 6.8        | 6.1            | 34.0          | 42.1       | 11.7       | 2.0                     | 102.6        | 86.3                                                      |
| 20 | 13.03.2023 | 7.1        | 6.1            | 36.1          | 42.4       | 9.2        | 2.0                     | 102.9        | 88.8                                                      |
| 21 | 20.03.2023 | 5.9        | 6.4            | 35.3          | 40.7       | 12.4       | 1.9                     | 102.6        | 85.7                                                      |
| 22 | 27.03.2023 | 7.0        | 6.6            | 40.5          | 35.0       | 11.7       | 2.3                     | 103.0        | 86.1                                                      |
| 23 | 03.04.2023 | 8.0        | 7.2            | 41.6          | 36.1       | 7.3        | 2.3                     | 102.4        | 90.4                                                      |
| 24 | 10.04.2023 | 8.5        | 6.7            | 41.5          | 36.7       | 7.7        | 1.9                     | 103.1        | 90.4                                                      |
| 25 | 18.04.2023 | 6.5        | 7.3            | 36.0          | 44.2       | 6.2        | 2.1                     | 102.3        | 91.7                                                      |

|    |            |     |     |      |      |      |     |       |      |
|----|------------|-----|-----|------|------|------|-----|-------|------|
| 26 | 24.04.2023 | 6.6 | 7.3 | 37.3 | 43.4 | 5.6  | 2.2 | 102.4 | 92.2 |
| 27 | 28.04.2023 | 7.1 | 7.4 | 39.1 | 38.8 | 7.8  | 2.5 | 102.6 | 89.8 |
| 28 | 09.05.2023 | 8.0 | 7.8 | 45.5 | 29.9 | 9.3  | 2.7 | 103.1 | 88.0 |
| 29 | 15.05.2023 | 8.5 | 7.7 | 42.4 | 29.1 | 12.5 | 2.8 | 103.1 | 84.7 |
| 30 | 22.05.2023 | 7.7 | 7.5 | 41.8 | 30.4 | 12.9 | 2.8 | 103.1 | 84.3 |
| 31 | 29.05.2023 | 7.5 | 7.5 | 42.0 | 30.1 | 13.4 | 2.5 | 103.0 | 84.0 |
| 32 | 05.06.2023 | 6.3 | 7.3 | 44.4 | 30.2 | 12.4 | 2.6 | 103.2 | 85.0 |
| 33 | 12.06.2023 | 7.7 | 7.3 | 44.1 | 27.7 | 13.7 | 2.6 | 103.1 | 83.7 |
| 34 | 19.06.2023 | 7.5 | 8.1 | 44.1 | 27.0 | 13.9 | 2.6 | 103.1 | 83.5 |
| 35 | 26.06.2023 | 8.2 | 7.7 | 41.5 | 26.6 | 16.8 | 2.2 | 103.0 | 80.9 |
| 36 | 03.07.2023 | 4.3 | 2.4 | 20.1 | 25.2 | 47.3 | 2.9 | 102.2 | 49.8 |
| 37 | 10.07.2023 | 3.5 | 2.2 | 20.9 | 31.1 | 41.6 | 3.0 | 102.2 | 55.4 |
| 38 | 17.07.2023 | 3.5 | 2.1 | 19.3 | 31.3 | 43.0 | 2.9 | 102.2 | 54.0 |
| 39 | 24.07.2023 | 3.7 | 2.2 | 20.5 | 26.8 | 46.1 | 2.9 | 102.2 | 51.0 |
| 40 | 11.08.2023 | 4.1 | 2.3 | 19.5 | 32.0 | 41.5 | 2.9 | 102.2 | 55.6 |
|    | min        | 3.5 | 2.1 | 19.3 | 25.0 | 5.6  | 1.9 | 101.9 | 49.8 |
|    | max        | 8.5 | 8.1 | 45.5 | 44.2 | 47.3 | 3.0 | 103.2 | 92.2 |



**Table S10.**  $\mu$ -value of the ICrA evaluation of relations of HDAs, HDM, conversion, reactor temperatures, ATB TSE, PBFO TSP, product yields, and H-Oil VTB properties.

| $\mu$                  | HDAs<br>(C <sub>5</sub> ) | HDAs<br>(C <sub>7</sub> ) | H-Oil<br>conv. | HDM         | T-R1001     | T-<br>R1002 | ATB<br>TSE | PBFO,<br>TSP | VT<br>B<br>D15 | VT<br>B<br>T50 | VT<br>B<br>M<br>W | VT<br>B<br>C <sub>5</sub><br>asp | VT<br>B<br>C <sub>7</sub><br>asp | VT<br>B<br>Sat. | VTB<br>Sul., |
|------------------------|---------------------------|---------------------------|----------------|-------------|-------------|-------------|------------|--------------|----------------|----------------|-------------------|----------------------------------|----------------------------------|-----------------|--------------|
| HDAs(C <sub>5</sub> )  | 1.00                      | <b>0.88</b>               | <b>0.79</b>    | <b>0.83</b> | 0.46        | 0.48        | 0.48       | 0.46         | 0.64           | 0.38           | 0.36              | 0.58                             | 0.62                             | 0.35            | <b>0.26</b>  |
| HDAs(C <sub>7</sub> )  | <b>0.88</b>               | 1.00                      | <b>0.78</b>    | <b>0.83</b> | 0.47        | 0.50        | 0.51       | 0.47         | 0.65           | 0.40           | 0.37              | 0.57                             | 0.59                             | 0.35            | <b>0.27</b>  |
| H-Oil conv.            | <b>0.79</b>               | <b>0.78</b>               | 1.00           | <b>0.82</b> | 0.57        | 0.55        | 0.36       | 0.40         | 0.82           | 0.24           | 0.20              | 0.76                             | 0.79                             | 0.17            | 0.36         |
| HDM                    | <b>0.83</b>               | <b>0.83</b>               | <b>0.82</b>    | 1.00        | 0.53        | 0.53        | 0.40       | 0.41         | 0.68           | 0.33           | 0.30              | 0.61                             | 0.63                             | 0.31            | 0.26         |
| T-R1001                | 0.46                      | 0.47                      | 0.57           | 0.53        | 1.00        | 0.90        | 0.17       | 0.19         | 0.56           | 0.07           | <b>0.03</b>       | 0.53                             | 0.53                             | <b>0.03</b>     | 0.20         |
| T-R1002                | 0.48                      | 0.50                      | 0.55           | 0.53        | <b>0.90</b> | 1.00        | 0.22       | 0.23         | 0.56           | 0.15           | <b>0.11</b>       | 0.54                             | 0.55                             | <b>0.09</b>     | 0.26         |
| ATB TSE                | 0.48                      | 0.51                      | 0.36           | 0.40        | <b>0.17</b> | <b>0.22</b> | 1.00       | 0.65         | 0.34           | 0.69           | 0.70              | 0.33                             | 0.35                             | 0.62            | 0.45         |
| PBFO, TSP              | 0.46                      | 0.47                      | 0.40           | 0.41        | <b>0.19</b> | <b>0.23</b> | 0.65       | 1.00         | 0.35           | 0.63           | 0.65              | 0.36                             | 0.36                             | 0.62            | 0.52         |
| VTB D15                | 0.64                      | 0.65                      | <b>0.82</b>    | 0.68        | 0.56        | 0.56        | 0.34       | 0.35         | 1.00           | 0.20           | 0.14              | 0.87                             | 0.89                             | 0.00            | 0.47         |
| VTB T50                | 0.38                      | 0.40                      | 0.24           | 0.33        | <b>0.07</b> | <b>0.15</b> | 0.69       | 0.63         | 0.20           | 1.00           | <b>0.91</b>       | 0.25                             | 0.21                             | <b>0.76</b>     | 0.55         |
| VTB MW                 | 0.36                      | 0.37                      | 0.20           | 0.30        | <b>0.03</b> | <b>0.11</b> | 0.70       | 0.65         | 0.14           | <b>0.91</b>    | 1.00              | 0.20                             | 0.16                             | <b>0.84</b>     | 0.56         |
| VTB C <sub>5</sub> asp | 0.58                      | 0.57                      | <b>0.76</b>    | 0.61        | 0.53        | 0.54        | 0.33       | 0.36         | <b>0.87</b>    | <b>0.25</b>    | <b>0.20</b>       | 1.00                             | 0.92                             | 0.13            | 0.53         |
| VTB C <sub>7</sub> asp | 0.62                      | 0.59                      | <b>0.79</b>    | 0.63        | 0.53        | 0.55        | 0.35       | 0.36         | <b>0.89</b>    | <b>0.21</b>    | <b>0.16</b>       | <b>0.92</b>                      | 1.00                             | 0.11            | 0.50         |
| VTB Sat.               | 0.35                      | 0.35                      | 0.17           | 0.31        | <b>0.03</b> | <b>0.09</b> | 0.62       | 0.62         | 0.00           | <b>0.76</b>    | <b>0.84</b>       | 0.13                             | 0.11                             | 1.00            | 0.51         |
| VTB Sul., wt. %        | <b>0.26</b>               | 0.27                      | 0.36           | 0.26        | <b>0.20</b> | 0.26        | 0.45       | 0.52         | 0.47           | 0.55           | 0.56              | 0.53                             | 0.50                             | 0.51            | 1.00         |
| Feed T50               | <b>0.15</b>               | <b>0.15</b>               | 0.21           | <b>0.18</b> | 0.13        | 0.16        | 0.51       | 0.51         | 0.37           | 0.57           | 0.61              | 0.39                             | 0.39                             | 0.61            | 0.68         |
| Feed MW                | <b>0.17</b>               | <b>0.17</b>               | 0.20           | <b>0.20</b> | 0.11        | 0.14        | 0.54       | 0.54         | 0.34           | 0.61           | 0.65              | 0.37                             | 0.37                             | 0.65            | 0.69         |
| Feed Sul., wt. %       | 0.31                      | 0.30                      | 0.38           | 0.28        | 0.19        | 0.26        | 0.43       | 0.52         | 0.48           | 0.53           | 0.53              | 0.54                             | 0.52                             | 0.50            | <b>0.89</b>  |
| Recycle                | 0.68                      | 0.65                      | <b>0.78</b>    | 0.68        | 0.48        | 0.46        | 0.33       | 0.37         | 0.78           | 0.20           | <b>0.19</b>       | 0.72                             | 0.77                             | <b>0.21</b>     | 0.34         |
| Gas yield, %           | 0.67                      | 0.67                      | <b>0.81</b>    | 0.73        | 0.56        | 0.56        | 0.33       | 0.32         | 0.86           | 0.20           | <b>0.15</b>       | <b>0.77</b>                      | <b>0.82</b>                      | <b>0.13</b>     | 0.40         |
| Naphtha yield, %       | 0.64                      | 0.65                      | <b>0.80</b>    | 0.66        | 0.56        | 0.55        | 0.35       | 0.40         | <b>0.87</b>    | 0.20           | <b>0.15</b>       | <b>0.82</b>                      | <b>0.84</b>                      | <b>0.12</b>     | 0.48         |
| Diesel yield, %        | 0.70                      | 0.69                      | <b>0.84</b>    | 0.70        | 0.54        | 0.56        | 0.29       | 0.38         | <b>0.85</b>    | 0.20           | <b>0.16</b>       | <b>0.81</b>                      | <b>0.85</b>                      | <b>0.15</b>     | 0.44         |
| VGO yield, %           | <b>0.75</b>               | <b>0.76</b>               | 0.65           | <b>0.75</b> | 0.41        | 0.44        | 0.55       | 0.51         | 0.51           | 0.52           | 0.50              | 0.47                             | 0.46                             | 0.48            | 0.27         |
| VTB yield, %           | <b>0.15</b>               | 0.16                      | <b>0.07</b>    | <b>0.15</b> | <b>0.04</b> | <b>0.08</b> | 0.56       | 0.54         | 0.24           | 0.67           | 0.73              | 0.28                             | 0.26                             | <b>0.76</b>     | 0.65         |
| VTB V, ppm             | 0.35                      | 0.33                      | 0.43           | 0.27        | <b>0.20</b> | <b>0.23</b> | 0.49       | 0.55         | 0.49           | 0.50           | 0.52              | 0.57                             | 0.55                             | 0.50            | <b>0.74</b>  |
| VTB Ni, ppm            | 0.39                      | 0.40                      | 0.52           | 0.38        | 0.34        | 0.35        | 0.36       | 0.48         | 0.63           | 0.36           | 0.37              | 0.67                             | 0.67                             | 0.37            | 0.66         |

Note: The bold values are those which denote the presence of statistically meaningful relation.

As input data, the ICrA method requires an  $m \times n$  table with the measurements or evaluations of  $m$  objects against  $n$  criteria. As a result, it returns an  $n \times n$  table with intuitionistic fuzzy pairs, defining the degrees of relation between each pair of criteria, hence the name “intercriteria”, and allows making informed decisions which render account of the inherent uncertainty that complex real-life problems exhibit. For the sake of terminological precision, in ICrA, the term “correlation” between the criteria is avoided but the terms “positive consonance”, “negative consonance” and “dissonance” are being used instead. For industrial objects which are characterized by a relatively strong “noise” caused by different disturbances of the process the meaning of  $\mu = 0.70 \div 1.00$ ;  $\nu = 0 \div 0.30$  denotes a statistically meaningful significant positive relation, where the strong positive consonance exhibits values of  $\mu = 0.90 \div 1.00$ ;  $\nu = 0 \div 0.1$ , and the weak positive consonance exhibits values of  $\mu = 0.70 \div 0.80$ ;  $\nu = 0.20 \div 0.30$ . Respectively, the values of negative consonance with  $\mu = 0 \div 0.30$ ;  $\nu = 0.70 \div 1.00$  means a statistically meaningful negative relation, where the strong negative consonance exhibits values of  $\mu = 0 \div 0.1$ ;  $\nu = 0.90 \div 1.00$ , and the weak

negative consonance exhibits values of  $\mu = 0.20 \div 0.30$ ;  $\nu = 0.70 \div 0.80$ . All other cases are considered as dissonance.

**Table S11.**  $\nu$ -value of the ICrA evaluation of relations of HDAs, HDM, conversion, reactor temperatures, ATB TSE, PBFO TSP, product yields, and H-Oil VTB properties.

| $\nu$                  | HDAs<br>(C <sub>5</sub> ) | HDAs<br>(C <sub>7</sub> ) | H-Oil<br>conv. | HDM  | T-<br>R1001 | T-<br>R1002 | ATB<br>TSE | PBFO,<br>TSP | VTB<br>D15 | VTB<br>T50 | VTB<br>MW | VTB<br>C <sub>5</sub><br>asp | VTB<br>C <sub>7</sub><br>asp | VTB<br>Sat. | VTB<br>Sul. |
|------------------------|---------------------------|---------------------------|----------------|------|-------------|-------------|------------|--------------|------------|------------|-----------|------------------------------|------------------------------|-------------|-------------|
| HDAs(C <sub>5</sub> )  | 0.00                      | 0.11                      | 0.19           | 0.16 | 0.12        | 0.16        | 0.48       | 0.51         | 0.36       | 0.59       | 0.63      | 0.41                         | 0.38                         | 0.64        | 0.73        |
| HDAs(C <sub>7</sub> )  | 0.11                      | 0.00                      | 0.21           | 0.17 | 0.11        | 0.14        | 0.46       | 0.50         | 0.35       | 0.57       | 0.62      | 0.42                         | 0.40                         | 0.64        | 0.72        |
| H-Oil conv.            | 0.19                      | 0.21                      | 0.00           | 0.17 | 0.01        | 0.10        | 0.60       | 0.57         | 0.18       | 0.72       | 0.79      | 0.23                         | 0.21                         | 0.82        | 0.62        |
| HDM                    | 0.16                      | 0.17                      | 0.17           | 0.00 | 0.05        | 0.12        | 0.56       | 0.56         | 0.31       | 0.64       | 0.68      | 0.38                         | 0.36                         | 0.68        | 0.73        |
| T-R1001                | 0.12                      | 0.11                      | 0.01           | 0.05 | 0.00        | 0.04        | 0.40       | 0.40         | 0.03       | 0.51       | 0.55      | 0.06                         | 0.05                         | 0.56        | 0.39        |
| T-R1002                | 0.16                      | 0.14                      | 0.10           | 0.12 | 0.04        | 0.00        | 0.41       | 0.42         | 0.09       | 0.48       | 0.53      | 0.11                         | 0.10                         | 0.56        | 0.39        |
| ATB TSE                | 0.48                      | 0.46                      | 0.60           | 0.56 | 0.40        | 0.41        | 0.00       | 0.29         | 0.63       | 0.25       | 0.26      | 0.63                         | 0.62                         | 0.34        | 0.51        |
| PBFO, TSP              | 0.51                      | 0.50                      | 0.57           | 0.56 | 0.40        | 0.42        | 0.29       | 0.00         | 0.62       | 0.32       | 0.32      | 0.60                         | 0.61                         | 0.35        | 0.44        |
| VTB D15                | 0.36                      | 0.35                      | 0.18           | 0.31 | 0.03        | 0.09        | 0.63       | 0.62         | 0.00       | 0.77       | 0.85      | 0.13                         | 0.11                         | 0.99        | 0.52        |
| VTB T50                | 0.59                      | 0.57                      | 0.72           | 0.64 | 0.51        | 0.48        | 0.25       | 0.32         | 0.77       | 0.00       | 0.05      | 0.72                         | 0.76                         | 0.20        | 0.41        |
| VTB MW                 | 0.63                      | 0.62                      | 0.79           | 0.68 | 0.55        | 0.53        | 0.26       | 0.32         | 0.85       | 0.05       | 0.00      | 0.79                         | 0.83                         | 0.14        | 0.43        |
| VTB C <sub>5</sub> asp | 0.41                      | 0.42                      | 0.23           | 0.38 | 0.06        | 0.11        | 0.63       | 0.60         | 0.13       | 0.72       | 0.79      | 0.00                         | 0.07                         | 0.86        | 0.45        |
| VTB C <sub>7</sub> asp | 0.38                      | 0.40                      | 0.21           | 0.36 | 0.05        | 0.10        | 0.62       | 0.61         | 0.11       | 0.76       | 0.83      | 0.07                         | 0.00                         | 0.88        | 0.49        |
| VTB Sat.               | 0.64                      | 0.64                      | 0.82           | 0.68 | 0.56        | 0.56        | 0.34       | 0.35         | 0.99       | 0.20       | 0.14      | 0.86                         | 0.88                         | 0.00        | 0.47        |
| VTB Sul.,<br>wt. %     | 0.73                      | 0.72                      | 0.62           | 0.73 | 0.39        | 0.39        | 0.51       | 0.44         | 0.52       | 0.41       | 0.43      | 0.45                         | 0.49                         | 0.47        | 0.00        |
| Feed T50               | 0.82                      | 0.82                      | 0.76           | 0.79 | 0.45        | 0.48        | 0.44       | 0.44         | 0.61       | 0.38       | 0.36      | 0.58                         | 0.59                         | 0.36        | 0.29        |
| Feed MW                | 0.82                      | 0.82                      | 0.79           | 0.79 | 0.48        | 0.50        | 0.42       | 0.43         | 0.65       | 0.36       | 0.34      | 0.62                         | 0.63                         | 0.34        | 0.30        |
| Feed Sul.,<br>wt. %    | 0.67                      | 0.69                      | 0.60           | 0.70 | 0.39        | 0.38        | 0.52       | 0.43         | 0.50       | 0.43       | 0.44      | 0.44                         | 0.47                         | 0.48        | 0.08        |
| Recycle                | 0.31                      | 0.35                      | 0.21           | 0.31 | 0.10        | 0.18        | 0.64       | 0.60         | 0.22       | 0.77       | 0.80      | 0.27                         | 0.23                         | 0.78        | 0.64        |
| Gas yield ,<br>%       | 0.69                      | 0.73                      | 0.64           | 0.68 | 0.39        | 0.45        | 0.45       | 0.45         | 0.55       | 0.44       | 0.44      | 0.54                         | 0.53                         | 0.43        | 0.35        |
| Naphtha<br>yield, %    | 0.32                      | 0.33                      | 0.18           | 0.26 | 0.03        | 0.09        | 0.64       | 0.65         | 0.14       | 0.77       | 0.84      | 0.22                         | 0.17                         | 0.85        | 0.59        |
| Diesel yield,<br>%     | 0.35                      | 0.34                      | 0.19           | 0.33 | 0.03        | 0.10        | 0.61       | 0.56         | 0.13       | 0.77       | 0.84      | 0.17                         | 0.16                         | 0.87        | 0.51        |

|                 |      |      |      |      |      |      |      |      |      |      |      |      |      |      |      |
|-----------------|------|------|------|------|------|------|------|------|------|------|------|------|------|------|------|
| VGO yield,<br>% | 0.29 | 0.31 | 0.15 | 0.30 | 0.04 | 0.09 | 0.67 | 0.59 | 0.15 | 0.77 | 0.83 | 0.18 | 0.14 | 0.84 | 0.55 |
| VTB yield, %    | 0.25 | 0.23 | 0.34 | 0.24 | 0.18 | 0.21 | 0.42 | 0.46 | 0.49 | 0.45 | 0.49 | 0.52 | 0.54 | 0.51 | 0.71 |
| VTB V, ppm      | 0.69 | 0.72 | 0.59 | 0.70 | 0.36 | 0.38 | 0.50 | 0.44 | 0.47 | 0.45 | 0.46 | 0.39 | 0.41 | 0.52 | 0.19 |
| VTB Ni,<br>ppm  | 0.64 | 0.67 | 0.56 | 0.72 | 0.38 | 0.41 | 0.48 | 0.42 | 0.51 | 0.47 | 0.47 | 0.42 | 0.44 | 0.49 | 0.24 |

**Table S12.** Operating conditions and calculated parameters from the heat balance of the FCC unit for the studied cases

| No. | Date       | FCC<br>Feed<br>Rate | HT<br>VGO | HOILVGOs<br>in FCC<br>FEED | ROT | CFT | Air<br>rate        | Str.<br>steam | Disp.+<br>lift<br>steams | T<br>REG<br>dense | T<br>REG<br>dilute | Hydrogen in<br>COKE | COKE | CTO | HEAT OF<br>REACTION | Δ<br>COKE | Coke of<br>Spent-<br>regenerated<br>Catalyst |
|-----|------------|---------------------|-----------|----------------------------|-----|-----|--------------------|---------------|--------------------------|-------------------|--------------------|---------------------|------|-----|---------------------|-----------|----------------------------------------------|
|     |            | t/h                 | t/h       | %                          | °C  | °C  | Nm <sup>3</sup> /h | kg/h          | kg/h                     | °C                | °C                 | wt%                 | wt%  | t/t | kJ/kg CF            | wt%       |                                              |
| 1   | 11.04.2022 | 194                 | 194       | 18                         | 550 | 325 | 114309             | 5126          | 10520                    | 686               | 698                | 8.1                 | 5    | 9.8 | 598                 | 0.51      | 0.51                                         |
| 2   | 23.05.2022 | 252                 | 175       | 31                         | 550 | 316 | 136590             | 5335          | 10100                    | 700               | 707                | 7.9                 | 5    | 8.5 | 526                 | 0.56      | 0.60                                         |
| 3   | 30.05.2022 | 251                 | 176       | 30                         | 550 | 320 | 135847             | 5335          | 9600                     | 695               | 703                | 7.1                 | 5    | 9.0 | 567                 | 0.55      | 0.54                                         |
| 4   | 06.06.2022 | 251                 | 176       | 30                         | 550 | 320 | 137190             | 5335          | 9620                     | 687               | 697                | 6.9                 | 5    | 9.5 | 565                 | 0.52      | 0.52                                         |
| 5   | 13.06.2022 | 245                 | 174       | 29                         | 545 | 321 | 134886             | 5223          | 9700                     | 681               | 692                | 6.0                 | 5    | 9.7 | 607                 | 0.52      | 0.61                                         |
| 6   | 20.06.2022 | 250                 | 172       | 31                         | 545 | 318 | 137288             | 5223          | 9700                     | 685               | 696                | 7.5                 | 5    | 9.2 | 560                 | 0.53      | 0.50                                         |
| 7   | 27.06.2022 | 250                 | 175       | 30                         | 550 | 318 | 136800             | 4943          | 9500                     | 693               | 702                | 7.6                 | 5    | 9.2 | 578                 | 0.54      | 0.50                                         |
| 8   | 04.07.2022 | 250                 | 175       | 30                         | 550 | 317 | 135974             | 5443          | 9700                     | 693               | 700                | 7.8                 | 5    | 9.1 | 561                 | 0.54      | 0.56                                         |
| 9   | 11.07.2022 | 249                 | 165       | 34                         | 550 | 314 | 135478             | 5518          | 9700                     | 696               | 703                | 7.6                 | 5    | 9.0 | 566                 | 0.55      | 0.54                                         |
| 10  | 05.09.2022 | 250                 | 172       | 31                         | 550 | 307 | 136108             | 6922          | 9700                     | 703               | 709                | 6.1                 | 5    | 8.4 | 517                 | 0.59      | 0.64                                         |
| 11  | 03.10.2022 | 250                 | 202       | 21                         | 544 | 320 | 139103             | 6814          | 9800                     | 710               | 718                | 7.3                 | 5    | 7.3 | 470                 | 0.65      | 0.63                                         |
| 12  | 28.11.2022 | 250                 | 203       | 19                         | 550 | 314 | 137514             | 5030          | 9363                     | 713               | 721                | 7.2                 | 5    | 7.6 | 484                 | 0.63      | 0.74                                         |
| 13  | 03.01.2023 | 251                 | 207       | 20                         | 550 | 320 | 136290             | 5232          | 9600                     | 710               | 717                | 7.2                 | 5    | 7.6 | 469                 | 0.62      | 0.49                                         |
| 14  | 30.01.2023 | 252                 | 194       | 23                         | 550 | 316 | 137220             | 5232          | 10100                    | 709               | 716                | 5.9                 | 5    | 7.8 | 471                 | 0.63      | 0.56                                         |
| 15  | 06.02.2023 | 213                 | 183       | 30                         | 550 | 314 | 123357             | 5915          | 10499                    | 711               | 720                | 6.2                 | 5    | 7.7 | 471                 | 0.65      | 0.62                                         |
| 16  | 13.02.2023 | 211                 | 179       | 29                         | 550 | 312 | 124056             | 5915          | 12839                    | 713               | 721                | 5.7                 | 5    | 7.6 | 468                 | 0.66      | 0.64                                         |
| 17  | 20.02.2023 | 203                 | 181       | 23                         | 550 | 316 | 113715             | 5915          | 10086                    | 703               | 714                | 6.0                 | 5    | 8.2 | 488                 | 0.60      | 0.54                                         |

|    |                   |     |     |    |     |     |        |      |       |     |     |     |   |     |     |      |      |
|----|-------------------|-----|-----|----|-----|-----|--------|------|-------|-----|-----|-----|---|-----|-----|------|------|
| 18 | <b>27.02.2023</b> | 189 | 171 | 20 | 550 | 314 | 111529 | 5732 | 10150 | 703 | 714 | 5.5 | 5 | 8.4 | 519 | 0.61 | 0.54 |
| 19 | <b>06.03.2023</b> | 201 | 176 | 21 | 550 | 314 | 119115 | 5676 | 10282 | 710 | 718 | 4.5 | 5 | 7.8 | 473 | 0.66 | 0.53 |
| 20 | <b>13.03.2023</b> | 184 | 168 | 37 | 547 | 314 | 106970 | 5832 | 10968 | 704 | 714 | 5.5 | 5 | 7.9 | 471 | 0.63 | 0.61 |
| 21 | <b>20.03.2023</b> | 158 | 143 | 41 | 545 | 301 | 106850 | 5587 | 11150 | 717 | 725 | 5.4 | 5 | 7.3 | 451 | 0.72 | 0.40 |
| 22 | <b>27.03.2023</b> | 151 | 140 | 24 | 547 | 302 | 99749  | 5232 | 11150 | 698 | 712 | 5.0 | 6 | 9.0 | 551 | 0.62 | 0.57 |
| 23 | <b>03.04.2023</b> | 148 | 137 | 19 | 547 | 317 | 93623  | 5032 | 13215 | 690 | 707 | 5.8 | 5 | 9.2 | 548 | 0.57 | 0.50 |
| 24 | <b>10.04.2023</b> | 151 | 127 | 36 | 547 | 303 | 92884  | 5401 | 14159 | 700 | 713 | 5.3 | 5 | 8.7 | 532 | 0.62 | 0.47 |
| 25 | <b>09.05.2023</b> | 202 | 166 | 46 | 542 | 299 | 117252 | 5897 | 10300 | 705 | 717 | 4.5 | 5 | 7.9 | 513 | 0.66 | 0.58 |
| 26 | <b>22.05.2023</b> | 191 | 170 | 24 | 545 | 306 | 114242 | 5867 | 10350 | 691 | 708 | 6.8 | 5 | 9.0 | 546 | 0.57 | 0.59 |
| 27 | <b>29.05.2023</b> | 191 | 170 | 33 | 545 | 305 | 112375 | 5867 | 10350 | 697 | 713 | 6.6 | 5 | 8.7 | 558 | 0.59 | 0.56 |
| 28 | <b>05.06.2023</b> | 171 | 157 | 30 | 545 | 298 | 104152 | 5867 | 10312 | 698 | 713 | 4.9 | 5 | 8.8 | 560 | 0.62 | 0.61 |
| 29 | <b>19.06.2023</b> | 198 | 170 | 31 | 545 | 299 | 119545 | 5867 | 10400 | 699 | 714 | 5.4 | 5 | 8.7 | 566 | 0.62 | 0.54 |
| 30 | <b>26.06.2023</b> | 213 | 183 | 24 | 545 | 304 | 122888 | 5867 | 9800  | 694 | 709 | 5.4 | 5 | 8.9 | 562 | 0.59 | 0.55 |
| 31 | <b>03.07.2023</b> | 217 | 189 | 17 | 545 | 311 | 124227 | 5867 | 10167 | 687 | 704 | 6.5 | 5 | 9.2 | 555 | 0.55 | 0.58 |
| 32 | <b>10.07.2023</b> | 216 | 190 | 17 | 545 | 311 | 124206 | 5867 | 9800  | 688 | 704 | 6.3 | 5 | 9.1 | 549 | 0.56 | 0.54 |
| 33 | <b>17.07.2023</b> | 218 | 190 | 20 | 546 | 311 | 126831 | 5867 | 9777  | 697 | 711 | 5.5 | 5 | 8.7 | 560 | 0.60 | 0.54 |
| 34 | <b>24.07.2023</b> | 216 | 193 | 18 | 546 | 312 | 127273 | 5867 | 9783  | 692 | 707 | 4.6 | 5 | 9.0 | 570 | 0.59 | 0.54 |
| 35 | <b>11.08.2023</b> | 230 | 199 | 21 | 546 | 323 | 129095 | 5867 | 9783  | 692 | 707 | 6.3 | 5 | 8.6 | 533 | 0.57 | 0.53 |

**Table S13.** Conversion and product yields obtained from the FCC unit for the studied cases

| No. | Date       | FCC Conv. | Dry gas | C3   | C4    | Naphtha | LCO   | HCO   | Slurry | Coke |
|-----|------------|-----------|---------|------|-------|---------|-------|-------|--------|------|
|     |            | wt%       | wt%     | wt%  | wt%   | wt%     | wt%   | wt%   | wt%    | wt%  |
| 1   | 11.04.2022 | 78.80     | 5.81    | 8.46 | 13.80 | 45.68   | 6.87  | 9.47  | 4.86   | 5.02 |
| 2   | 23.05.2022 | 71.14     | 5.91    | 6.64 | 11.22 | 42.51   | 10.66 | 8.28  | 9.92   | 4.80 |
| 3   | 30.05.2022 | 72.88     | 5.68    | 7.19 | 11.93 | 43.14   | 11.34 | 7.53  | 8.25   | 4.93 |
| 4   | 06.06.2022 | 74.74     | 6.19    | 6.97 | 12.06 | 44.56   | 11.15 | 7.11  | 7.01   | 4.95 |
| 5   | 13.06.2022 | 74.78     | 5.99    | 6.70 | 12.46 | 44.52   | 11.21 | 7.44  | 6.57   | 5.05 |
| 6   | 20.06.2022 | 72.49     | 5.63    | 6.58 | 11.62 | 43.78   | 11.03 | 7.55  | 8.94   | 4.85 |
| 7   | 27.06.2022 | 73.55     | 6.67    | 6.68 | 11.75 | 43.43   | 11.19 | 7.95  | 7.32   | 4.94 |
| 8   | 04.07.2022 | 73.71     | 6.20    | 6.70 | 11.31 | 44.59   | 10.96 | 8.14  | 7.19   | 4.87 |
| 9   | 11.07.2022 | 73.45     | 6.32    | 6.59 | 11.10 | 44.46   | 11.17 | 8.18  | 7.20   | 4.93 |
| 10  | 05.09.2022 | 71.75     | 6.26    | 6.31 | 10.84 | 43.35   | 10.79 | 9.73  | 7.74   | 4.98 |
| 11  | 03.10.2022 | 74.76     | 5.47    | 7.07 | 11.73 | 45.69   | 9.37  | 8.89  | 6.99   | 4.72 |
| 12  | 28.11.2022 | 74.44     | 6.83    | 6.00 | 10.55 | 46.15   | 9.25  | 9.14  | 7.17   | 4.84 |
| 13  | 03.01.2023 | 74.47     | 6.34    | 6.22 | 10.69 | 46.45   | 9.14  | 9.91  | 6.48   | 4.72 |
| 14  | 30.01.2023 | 74.77     | 6.31    | 6.12 | 10.96 | 46.48   | 8.65  | 10.06 | 6.51   | 4.87 |
| 15  | 06.02.2023 | 72.84     | 6.71    | 6.02 | 11.02 | 44.11   | 8.53  | 10.27 | 8.36   | 4.95 |
| 16  | 13.02.2023 | 72.23     | 5.97    | 5.83 | 11.10 | 44.25   | 8.93  | 10.55 | 8.29   | 5.00 |
| 17  | 20.02.2023 | 73.98     | 5.79    | 6.48 | 12.22 | 44.51   | 9.31  | 10.79 | 5.91   | 4.95 |
| 18  | 27.02.2023 | 75.36     | 6.07    | 6.91 | 12.63 | 44.57   | 9.16  | 10.47 | 5.01   | 5.15 |
| 19  | 06.03.2023 | 73.60     | 6.22    | 6.60 | 12.15 | 43.48   | 10.21 | 11.26 | 4.93   | 5.12 |
| 20  | 13.03.2023 | 71.96     | 5.07    | 6.47 | 11.73 | 43.66   | 10.83 | 12.30 | 4.91   | 4.97 |
| 21  | 20.03.2023 | 70.72     | 4.97    | 7.09 | 11.69 | 41.66   | 8.65  | 10.03 | 10.60  | 5.28 |
| 22  | 27.03.2023 | 74.90     | 5.11    | 7.00 | 12.90 | 44.34   | 7.07  | 11.76 | 6.26   | 5.52 |
| 23  | 03.04.2023 | 75.68     | 4.92    | 7.21 | 13.26 | 44.98   | 6.56  | 12.40 | 5.36   | 5.29 |
| 24  | 10.04.2023 | 71.63     | 4.77    | 6.68 | 11.62 | 43.14   | 6.66  | 11.40 | 10.30  | 5.38 |
| 25  | 09.05.2023 | 72.74     | 4.76    | 6.45 | 10.74 | 45.51   | 8.28  | 9.78  | 9.21   | 5.22 |
| 26  | 22.05.2023 | 76.87     | 5.07    | 7.20 | 12.02 | 47.35   | 8.31  | 7.74  | 7.08   | 5.15 |
| 27  | 29.05.2023 | 75.54     | 5.58    | 7.13 | 11.73 | 45.84   | 8.03  | 7.70  | 8.73   | 5.18 |
| 28  | 05.06.2023 | 75.50     | 5.73    | 7.49 | 12.13 | 44.69   | 6.91  | 9.72  | 7.87   | 5.44 |
| 29  | 19.06.2023 | 72.98     | 5.08    | 7.42 | 11.69 | 43.41   | 8.60  | 10.50 | 7.92   | 5.34 |
| 30  | 26.06.2023 | 74.25     | 4.84    | 7.53 | 11.69 | 44.93   | 8.25  | 10.68 | 6.82   | 5.24 |
| 31  | 03.07.2023 | 75.96     | 4.97    | 7.75 | 12.37 | 45.79   | 9.27  | 10.11 | 4.67   | 5.07 |
| 32  | 10.07.2023 | 77.47     | 5.30    | 7.87 | 12.48 | 46.68   | 9.05  | 8.55  | 4.92   | 5.07 |
| 33  | 17.07.2023 | 75.25     | 5.06    | 7.60 | 12.16 | 45.14   | 9.55  | 8.19  | 7.01   | 5.20 |
| 34  | 24.07.2023 | 77.74     | 5.36    | 7.81 | 13.22 | 46.02   | 8.86  | 7.77  | 5.64   | 5.30 |
| 35  | 11.08.2023 | 76.59     | 5.01    | 7.39 | 12.47 | 46.70   | 8.87  | 9.79  | 4.75   | 4.93 |

**Table S14.**  $\mu$ -value of the ICRA evaluation of relations of H-Oil performance variables and FCC performance variables.

| $\mu$                    | H-Oil<br>conv | PBFO,<br>TSP | FCC SLO, %<br>in H-Oil Feed | Hoil VGO in<br>FCC Feed, % | H-Oil VGO<br>D15 | Dry<br>Gas,<br>wt. % | PPF,<br>wt. % | BBF,<br>wt. % | CN,<br>wt. % | LCO,<br>wt. % | HCO,<br>wt. % | SLO,<br>wt. % |
|--------------------------|---------------|--------------|-----------------------------|----------------------------|------------------|----------------------|---------------|---------------|--------------|---------------|---------------|---------------|
| Conversion, %            | 0.48          | 0.59         | <b>0.28</b>                 | <b>0.21</b>                | 0.49             | 0.47                 | 0.64          | 0.66          | 0.79         | 0.37          | 0.45          | 0.26          |
| H-Oil VGO in FCC Feed, % | 0.54          | 0.42         | 0.71                        | 1.00                       | 0.46             | 0.36                 | 0.41          | 0.31          | 0.26         | 0.50          | 0.41          | 0.73          |
| H-Oil VGO D15            | <b>0.71</b>   | 0.47         | 0.60                        | 0.46                       | 1.00             | 0.35                 | 0.47          | 0.32          | 0.55         | 0.25          | 0.61          | 0.59          |
| Coke, wt. %              | <b>0.72</b>   | 0.29         | 0.51                        | 0.51                       | 0.53             | 0.20                 | 0.57          | 0.55          | 0.38         | 0.22          | 0.58          | 0.45          |
| $\Delta$ Coke            | <b>0.74</b>   | 0.32         | 0.61                        | 0.46                       | 0.59             | 0.40                 | 0.32          | 0.33          | 0.44         | 0.34          | 0.67          | 0.51          |
| Dry Gas yield, wt. %     | 0.28          | 0.50         | 0.40                        | 0.36                       | 0.35             | 1.00                 | 0.26          | 0.35          | 0.49         | 0.63          | 0.36          | 0.42          |
| PPF yield, wt. %         | 0.50          | 0.54         | 0.41                        | 0.41                       | 0.47             | 0.26                 | 1.00          | 0.71          | 0.49         | 0.39          | 0.42          | 0.43          |
| BBF yield, wt. %         | 0.49          | 0.51         | 0.28                        | 0.31                       | 0.32             | 0.35                 | 0.71          | 1.00          | 0.46         | 0.41          | 0.49          | 0.29          |
| CN yield, wt. %          | 0.49          | 0.54         | 0.36                        | <b>0.26</b>                | 0.55             | 0.49                 | 0.49          | 0.46          | 1.00         | 0.36          | 0.44          | 0.34          |
| LCO yield, wt. %         | <b>0.21</b>   | 0.58         | 0.43                        | 0.50                       | 0.25             | 0.63                 | 0.39          | 0.41          | 0.36         | 1.00          | 0.29          | 0.46          |
| HCO yield, wt. %         | <b>0.75</b>   | <b>0.24</b>  | 0.49                        | 0.41                       | 0.61             | 0.36                 | 0.42          | 0.49          | 0.44         | 0.29          | 1.00          | 0.38          |
| SLO yield, wt. %         | 0.50          | 0.52         | <b>0.79</b>                 | <b>0.73</b>                | 0.59             | 0.42                 | 0.43          | 0.29          | 0.34         | 0.46          | 0.38          | 1.00          |

Note: The bold values are those which denote the presence of statistically meaningful relation.

**Table S15.**  $\nu$ -value of the ICRA evaluation of relations of H-Oil performance variables and FCC performance variables.

| $\nu$                       | H-Oil<br>conv | PBFO,<br>TSP | FCC SLO, %<br>in H-Oil Feed | Hoil VGO in<br>FCC Feed, % | H-Oil VGO<br>D15 | Dry<br>Gas,<br>wt.% | PPF,<br>wt.% | BBF,<br>wt.% | CN,<br>wt.% | LCO,<br>wt.% | HCO,<br>wt.% | SLO,<br>wt.% |      |
|-----------------------------|---------------|--------------|-----------------------------|----------------------------|------------------|---------------------|--------------|--------------|-------------|--------------|--------------|--------------|------|
| Conversion,%                |               | 0.51         | 0.38                        | 0.71                       | 0.72             | 0.48                |              | 0.47         | 0.31        | 0.29         | 0.18         | 0.59         | 0.54 |
| H-Oil VGO in FCC Feed,<br>% |               | 0.39         | 0.48                        | 0.22                       | 0.00             | 0.45                |              | 0.55         | 0.48        | 0.58         | 0.66         | 0.41         | 0.51 |
| H-Oil VGO D15               |               | 0.30         | 0.47                        | 0.36                       | 0.45             | 0.00                |              | 0.57         | 0.45        | 0.60         | 0.39         | 0.70         | 0.36 |
| Coke, wt.%                  |               | 0.18         | 0.56                        | 0.36                       | 0.35             | 0.32                |              | 0.64         | 0.25        | 0.28         | 0.47         | 0.65         | 0.28 |
| $\Delta$ Coke               |               | 0.26         | 0.60                        | 0.33                       | 0.42             | 0.32                |              | 0.50         | 0.58        | 0.57         | 0.48         | 0.58         | 0.26 |
| Dry Gas yield, wt.%         |               | 0.67         | 0.42                        | 0.54                       | 0.55             | 0.57                |              | 0.00         | 0.64        | 0.56         | 0.44         | 0.29         | 0.58 |
| PPF yield, wt.%             |               | 0.45         | 0.39                        | 0.53                       | 0.48             | 0.45                |              | 0.64         | 0.00        | 0.21         | 0.43         | 0.53         | 0.52 |
| BBF yield, wt.%             |               | 0.45         | 0.42                        | 0.66                       | 0.58             | 0.60                |              | 0.56         | 0.21        | 0.00         | 0.46         | 0.51         | 0.45 |
| CN yield, wt.%              |               | 0.48         | 0.41                        | 0.61                       | 0.74             | 0.39                |              | 0.44         | 0.43        | 0.46         | 0.00         | 0.58         | 0.53 |
| LCO yield, wt.%             |               | 0.75         | 0.36                        | 0.53                       | 0.41             | 0.70                |              | 0.29         | 0.53        | 0.51         | 0.58         | 0.00         | 0.67 |
| HCO yield, wt.%             |               | 0.24         | 0.72                        | 0.49                       | 0.51             | 0.36                |              | 0.58         | 0.52        | 0.45         | 0.53         | 0.67         | 0.00 |
| SLO yield, wt.%             |               | 0.48         | 0.43                        | 0.19                       | 0.18             | 0.36                |              | 0.51         | 0.49        | 0.64         | 0.62         | 0.49         | 0.59 |

#### Nomenclature:

|          |                                  |
|----------|----------------------------------|
| AR       | Atmospheric residue              |
| ATB      | Atmospheric tower bottom product |
| BBF      | Butane-Butylene fraction         |
| Basrah H | Basrah Heavy crude oil           |
| CAS      | Computer algebra system          |
| CII      | Colloidal instability index      |

|                        |                                                           |
|------------------------|-----------------------------------------------------------|
| CN                     | Cracked naphtha (gasoline)                                |
| CPC                    | Caspian pipeline consortium                               |
| CSTR                   | Continuous stirred tank reactor                           |
| D15                    | Density at 15°C, g/cm <sup>3</sup>                        |
| FCC                    | Fluid catalytic cracking                                  |
| FCCPT                  | Fluid catalytic cracking pretreater (feed hydrotreater)   |
| HAGO                   | Heavy atmospheric gas oil                                 |
| HCO                    | Heavy cycle oil                                           |
| HDAs                   | Hydrodeasphaltization                                     |
| HDAs(C <sub>5</sub> ), | Extent of removal of C <sub>5</sub> -asphaltenes, %       |
| HDAs(C <sub>7</sub> ), | Extent of removal of C <sub>7</sub> -asphaltenes, %       |
| HDM                    | Hydrodemetallization                                      |
| HDS                    | Hydrodesulfurization                                      |
| HVGO                   | Heavy vacuum gas oil                                      |
| IBP                    | Initial boiling point                                     |
| ICrA                   | Intercriteria analysis                                    |
| LCO                    | Light cycle oil                                           |
| LHSV                   | Liquid hourly space velocity                              |
| LSCO                   | Light Siberian crude oil                                  |
| LNB                    | LUKOIL Neftohim Burgas                                    |
| LVGO                   | Light vacuum gas oil                                      |
| MNA                    | Mono-nuclear aromatics                                    |
| MW                     | Molecular weight                                          |
| PBFO                   | Partially blended fuel oil                                |
| PPF                    | Propane-Propylene fraction                                |
| Sat.                   | Saturate content                                          |
| SLO                    | Slurry oil                                                |
| SRVGO                  | Straight run vacuum gas oil                               |
| SRVR                   | Straight run vacuum residue                               |
| Sul.                   | Sulphur content                                           |
| T50                    | Temperature at 50% evaporate                              |
| T-R1001                | Temperature in the first ebullated bed reactor            |
| T-R1002                | Temperature in the second ebullated bed reactor           |
| TSE                    | Total sediment existent, wt. %                            |
| TSP                    | Total sediment potential, wt. %                           |
| TBP                    | True boiling point distillation                           |
| VDU                    | Vacuum distillation unit                                  |
| VGO                    | Vacuum gas oil                                            |
| VR                     | Vacuum residue                                            |
| VTB                    | Vacuum tower bottom product = hydrocracked vacuum residue |
| WABT                   | Weight average bed temperature                            |
